# Supplementary material for: Metal-free oxidative functionalization of C(sp3)–H of ketones and alcohols for the synthesis of isoquinolinonediones
Source: Royal Society of Chemistry journal article supplement (doi:10.1039/c6ra12657j), 2016-01-01

# Metal-Free Oxidative Functionalization of C(sp<sup>3</sup>)-H of Ketones and Alcohols for the Synthesis of Isoquinolinonediones

Su-Li Zhu,<sup>a</sup> Ping-Xin Zhou<sup>b</sup> and Xiao-Feng Xia<sup>a\*</sup>

<sup>a</sup> The Key Laboratory of Food Colloids and Biotechnology, Ministry of Education, School of Chemical and Material Engineering, Jiangnan University, Wuxi, Jiangsu, 214122, China. E-mail: [xiayf@jiangnan.edu.cn](mailto:xiayf@jiangnan.edu.cn).

<sup>b</sup> School of Basic Medical Sciences, Xinxiang Medical University, Xinxiang, Henan, 453003, China.

## Table of Contents

|   |                                                                               |       |
|---|-------------------------------------------------------------------------------|-------|
| 1 | <b>General Remarks</b>                                                        | S2    |
| 2 | <b>KIE experiment</b>                                                         | S2    |
| 3 | <b><sup>1</sup>H NMR and <sup>13</sup>C NMR spectra for compounds 3 and 4</b> | S4-28 |

**General Remarks:** Column chromatography was carried out on silica gel. Unless noted  $^1\text{H}$  NMR spectra were recorded on 400 MHz in  $\text{CDCl}_3$ ,  $^{13}\text{C}$  NMR spectra were recorded on 100 MHz in  $\text{CDCl}_3$ . IR spectra were recorded on an FT-IR spectrometer and only major peaks are reported in  $\text{cm}^{-1}$ . Melting points were determined on a microscopic apparatus and were uncorrected. All new products were further characterized by HRMS (high resolution mass spectra), high resolution mass spectrometry (HRMS) spectra was obtained on a Thermo Scientific LTQ Orbitrap XL instrument equipped with an ESI source; copies of their  $^1\text{H}$  NMR and  $^{13}\text{C}$  NMR spectra are provided.

## Kinetic Isotope Effect (KIE) Experiment

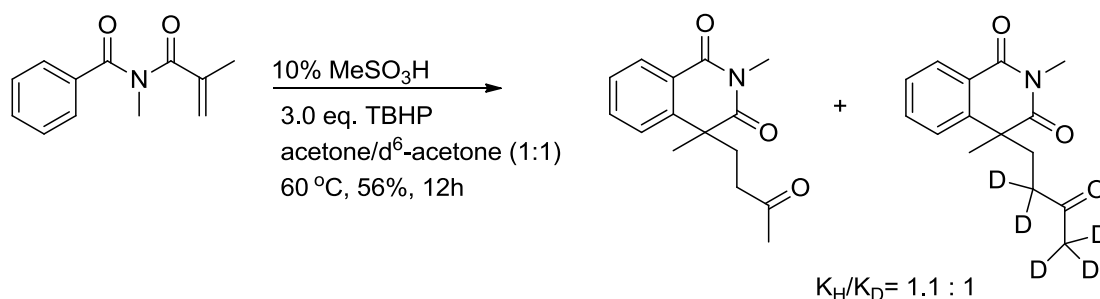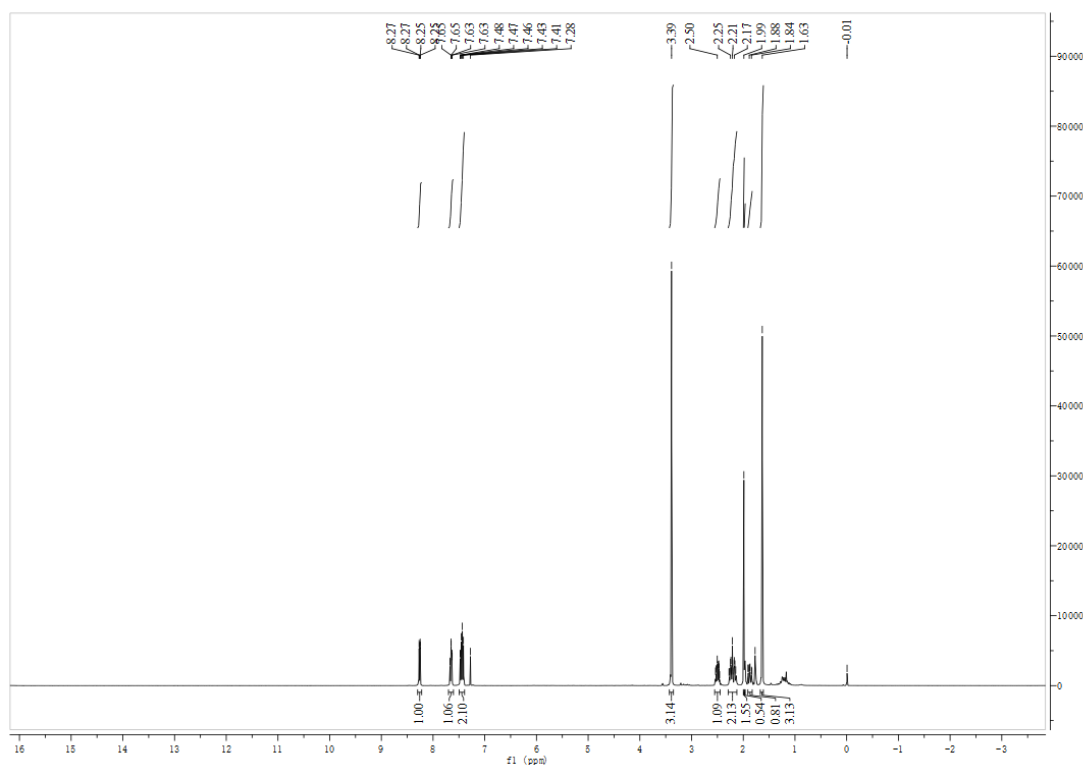

## Preparation of Tetrahydrofuro[2,3-c]isoquinolin-5(2H)-one **5a** from **4a**.

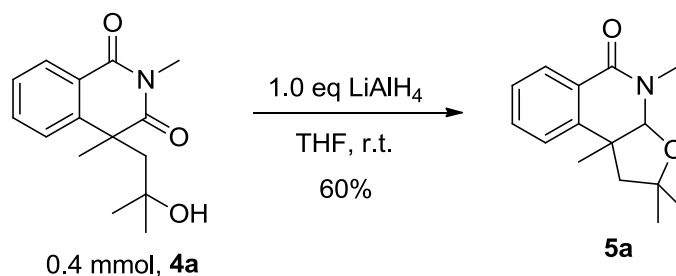

An oven-dried Schlenk tube (10 mL) was equipped with a magnetic stir bar, **4a** (0.4 mmol), dry THF (5.0 mL). The reaction mixture was then stirred at 0 °C, and 1.0 equiv. LiAlH<sub>4</sub> (28 mg) was slowly added. After the reaction was completed, 6 mL water was added to quench the reaction at 0 °C, and the resulting mixture was extracted twice with EtOAc (2×10 mL). The combined organic extracts were washed with brine, dried over Na<sub>2</sub>SO<sub>4</sub> and concentrated. Purification of the crude product by flash column chromatography afforded the product **5a** (petroleum ether/ethyl acetate as eluent (4:1)).

**5a**, m.p.=100-102 °C, 2,2,4,9b-tetramethyl-1,3a,4,9b-tetrahydrofuro[2,3-c]isoquinolin-5(2H)-one, <sup>1</sup>H NMR (400 MHz): 8.17-8.19 (m, 1 H), 7.49-7.53 (m, 1 H), 7.29-7.36 (m, 2 H), 4.94 (s, 1 H), 3.24 (s, 3 H), 2.55-2.58 (m, 1 H), 2.07-2.10 (m, 1 H), 1.40 (s, 3 H), 1.34 (s, 3 H), 0.86 (s, 3 H);

<sup>13</sup>C NMR (100 MHz): 163.6, 143.7, 132.2, 128.6, 126.8, 126.5, 125.5, 95.9, 78.2, 52.3, 44.9, 34.4, 30.3, 28.9, 26.9;

IR (cm<sup>-1</sup>): 2969, 2929, 2871, 1656, 1474, 1338, 1021, 765, 703;

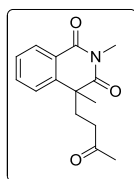

3a

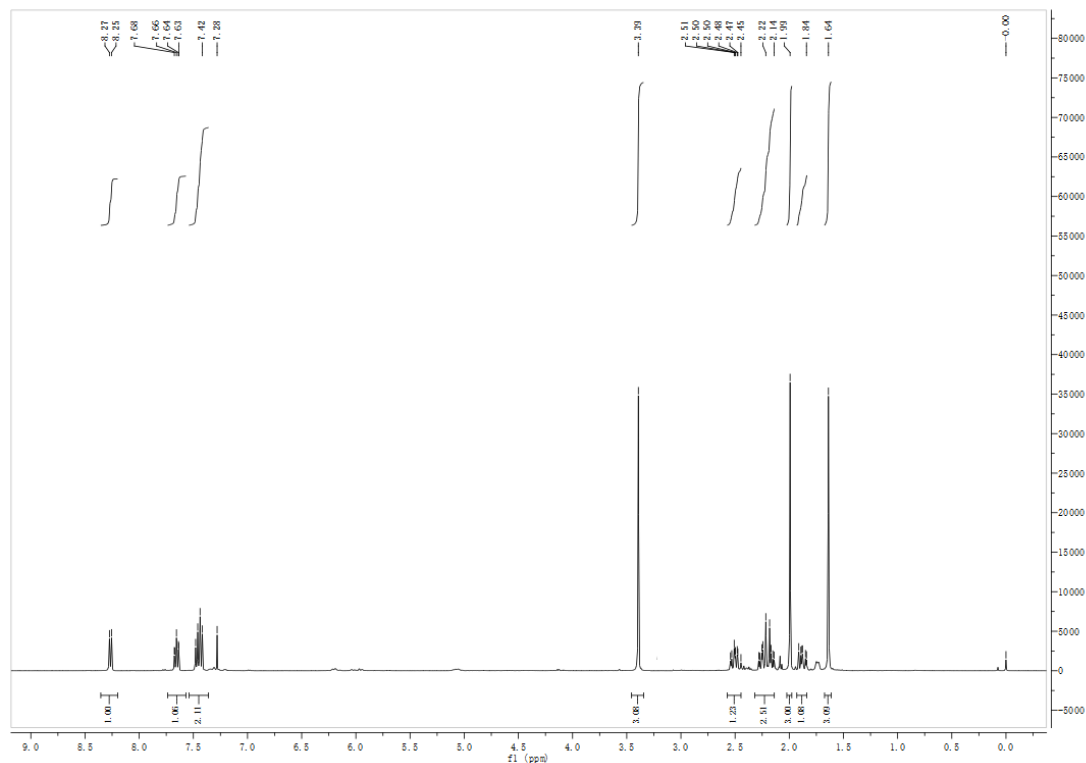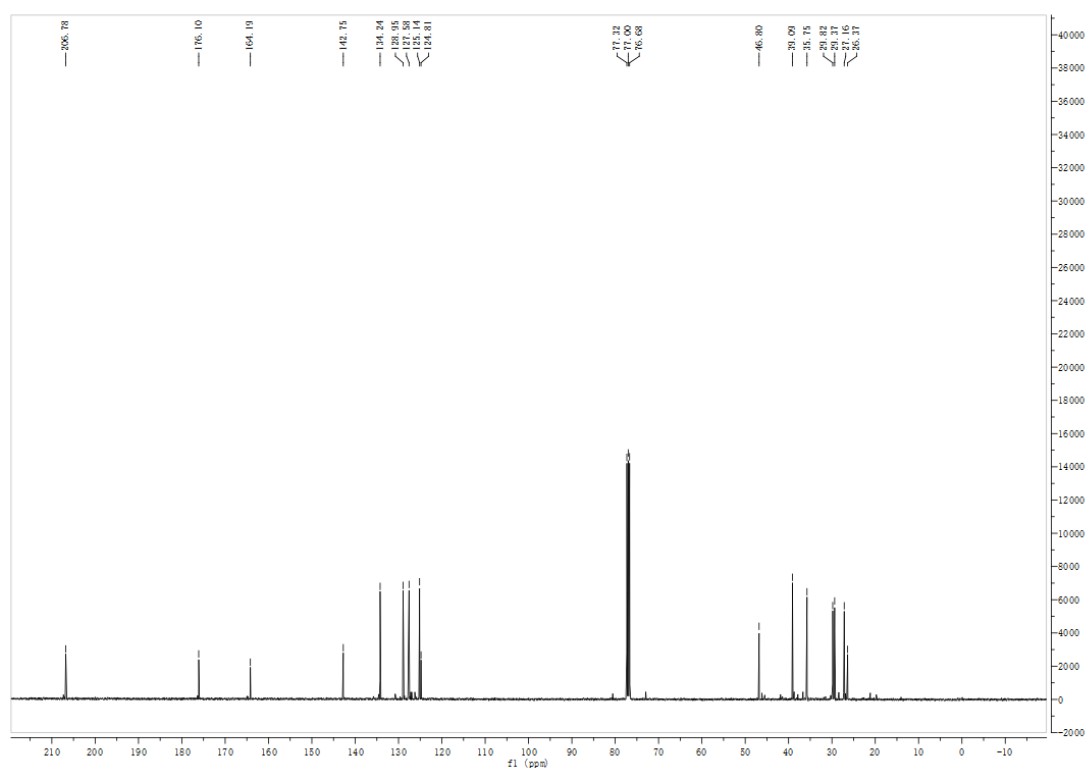

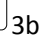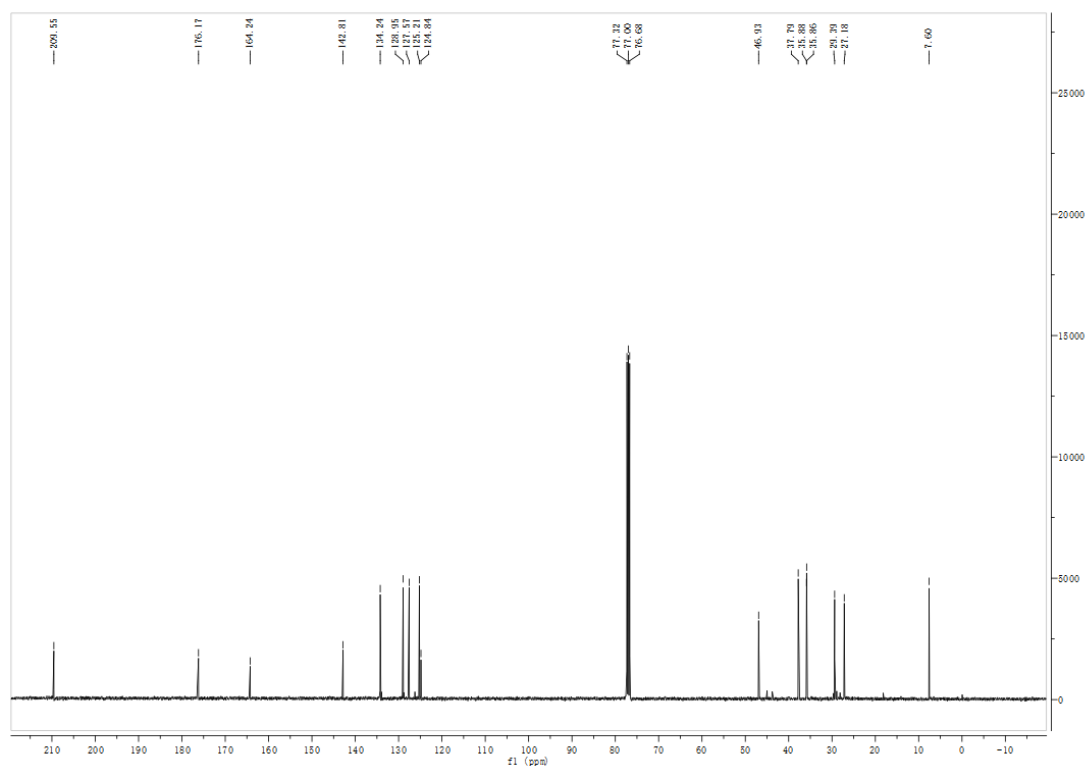

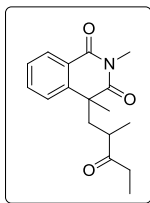

3c

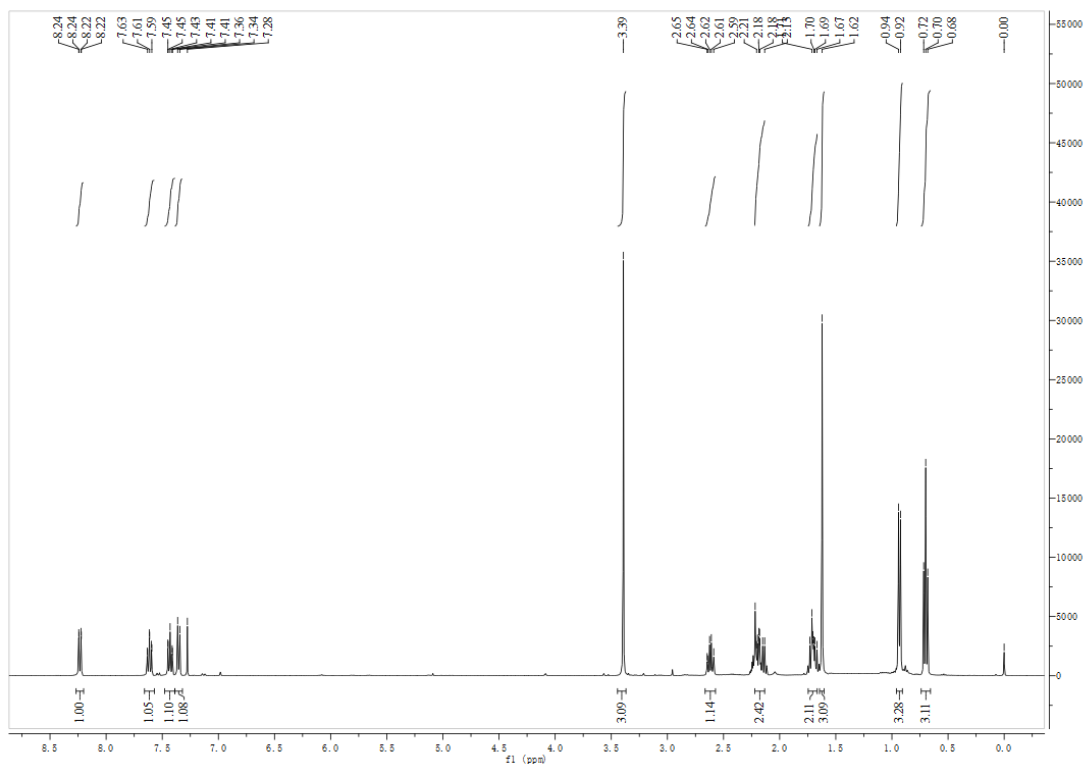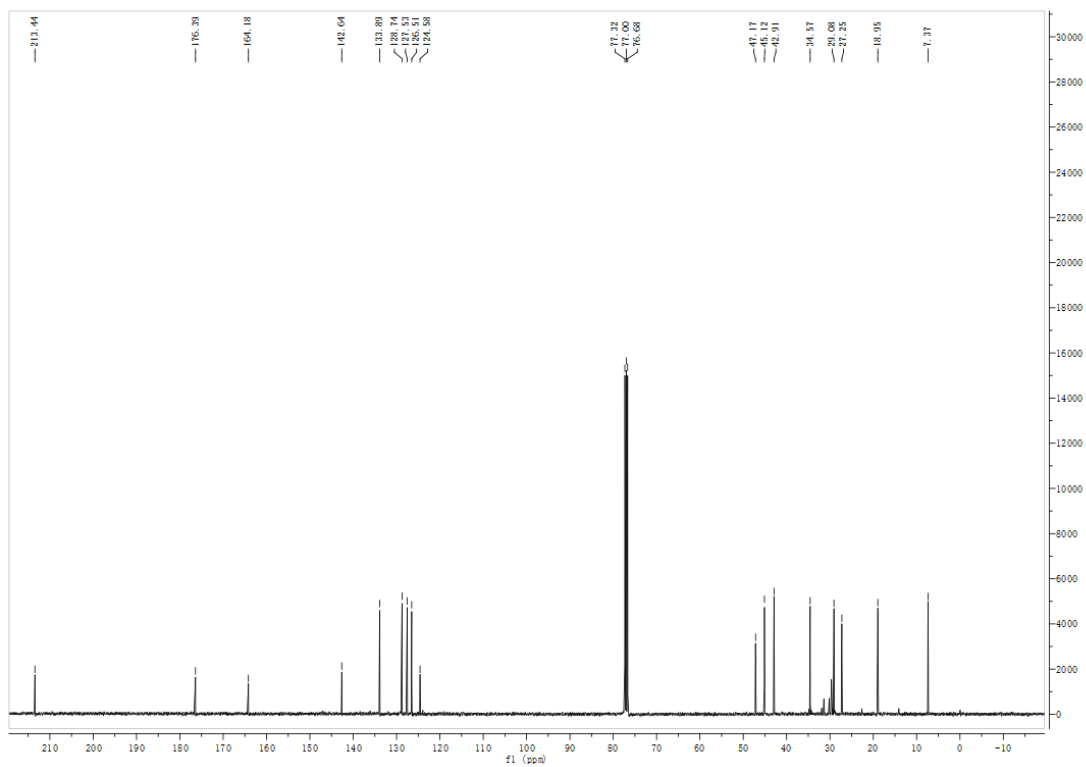

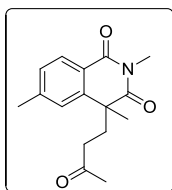

3d

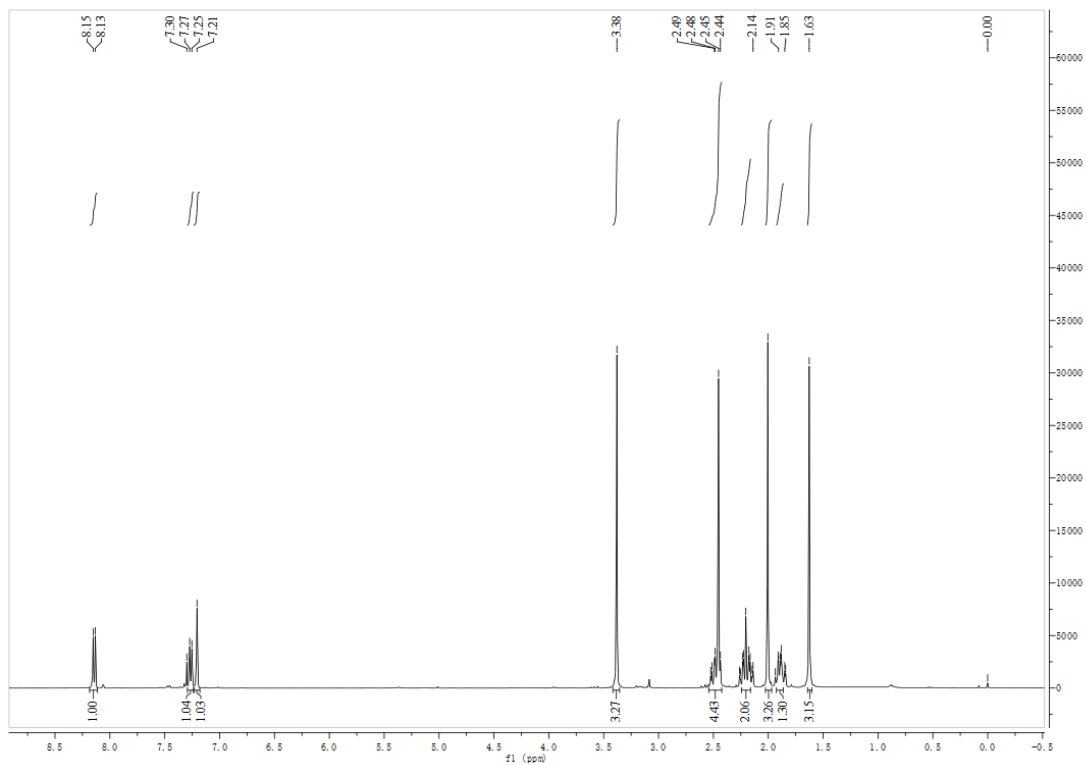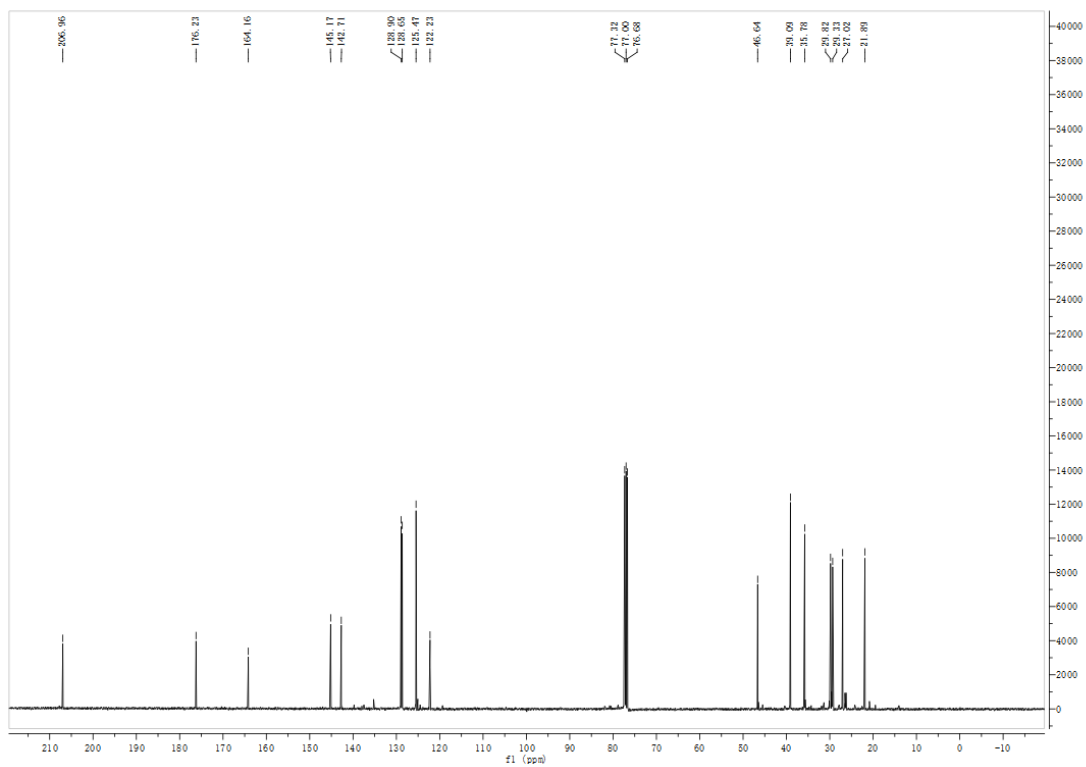

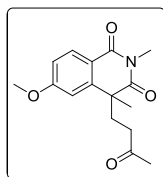

3e

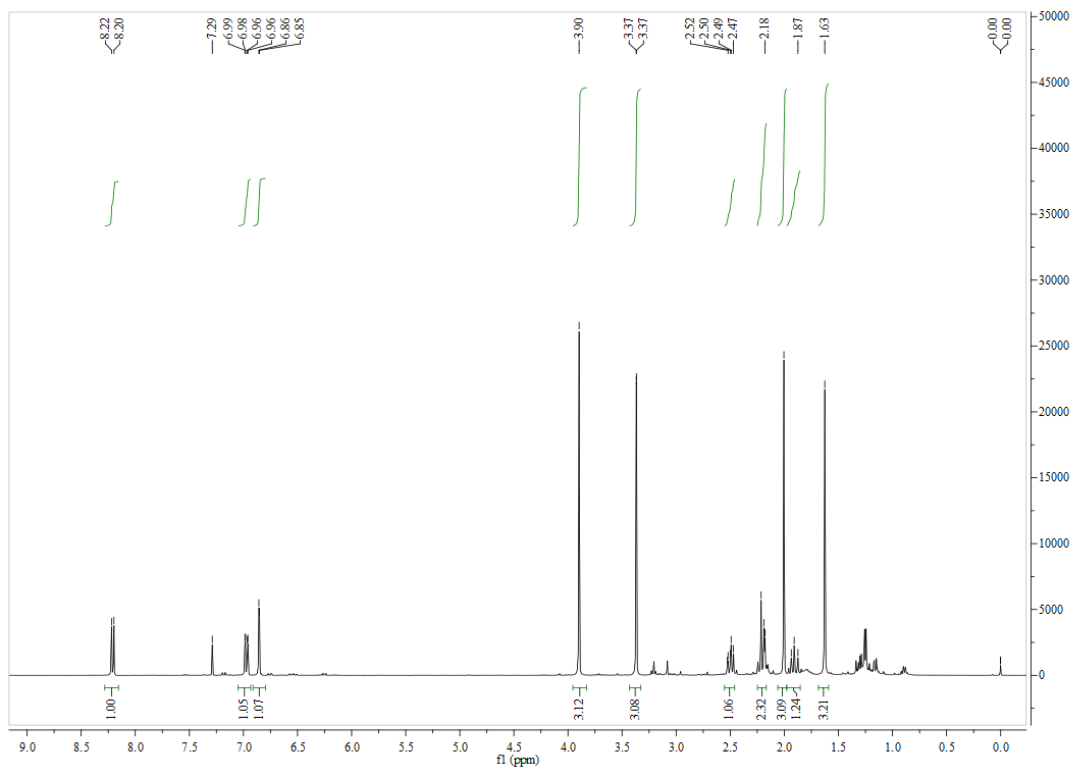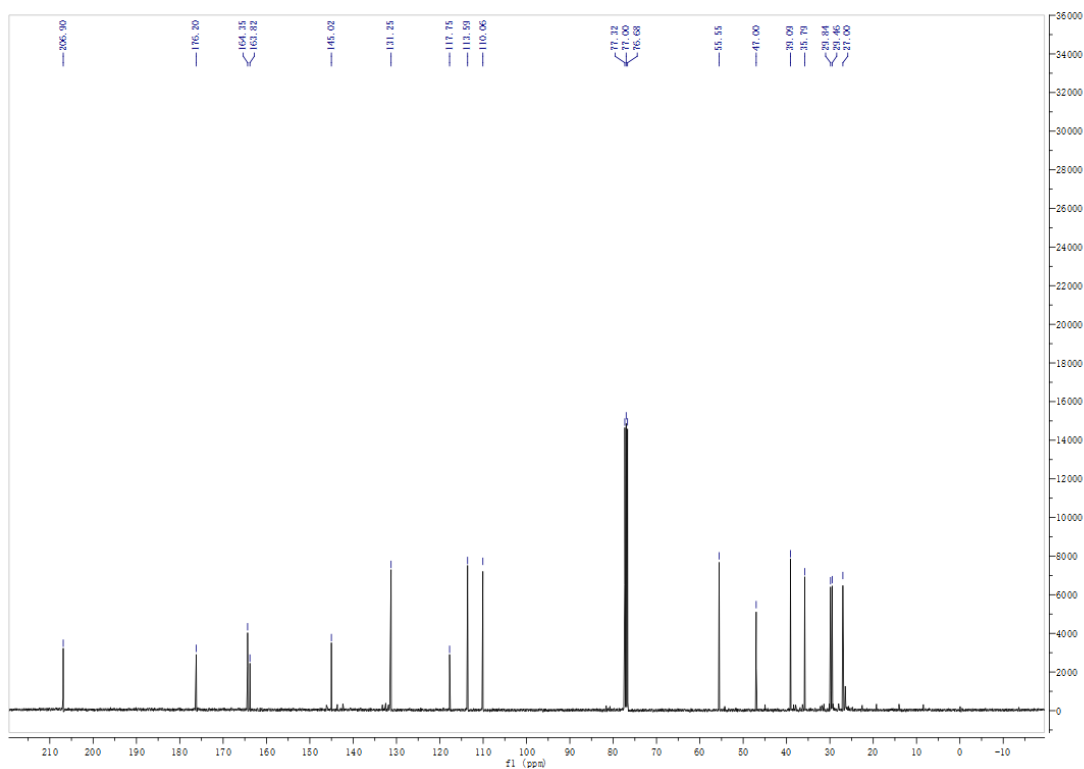

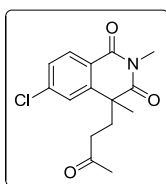

3f

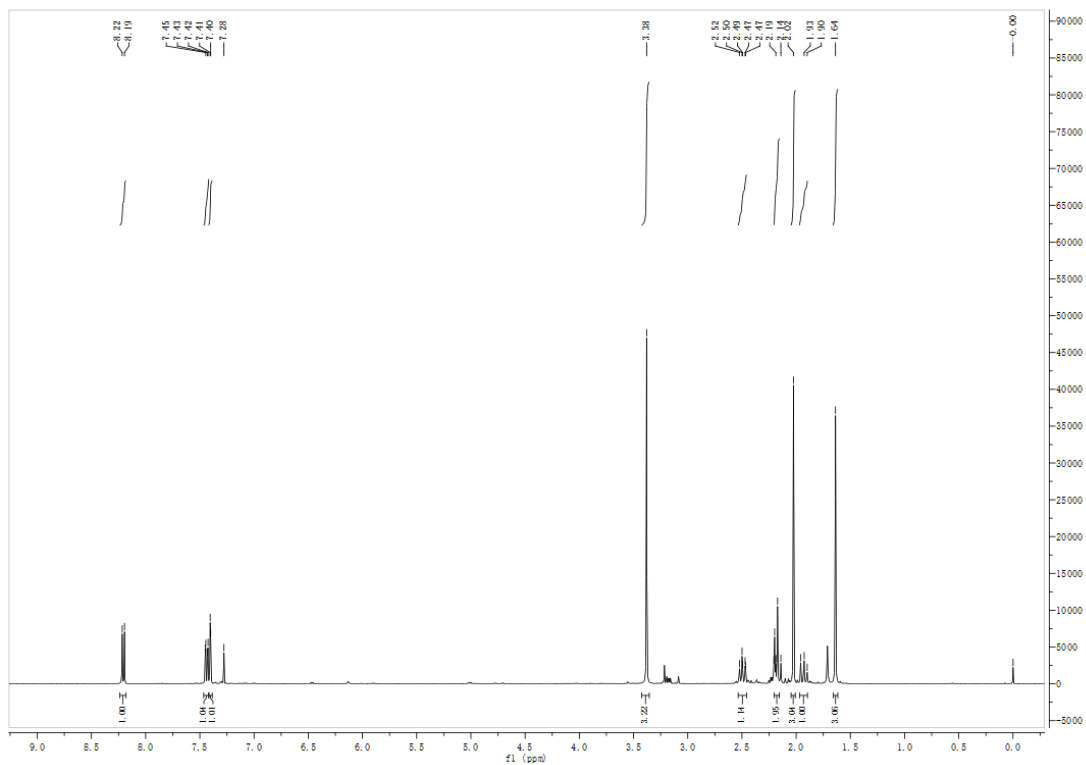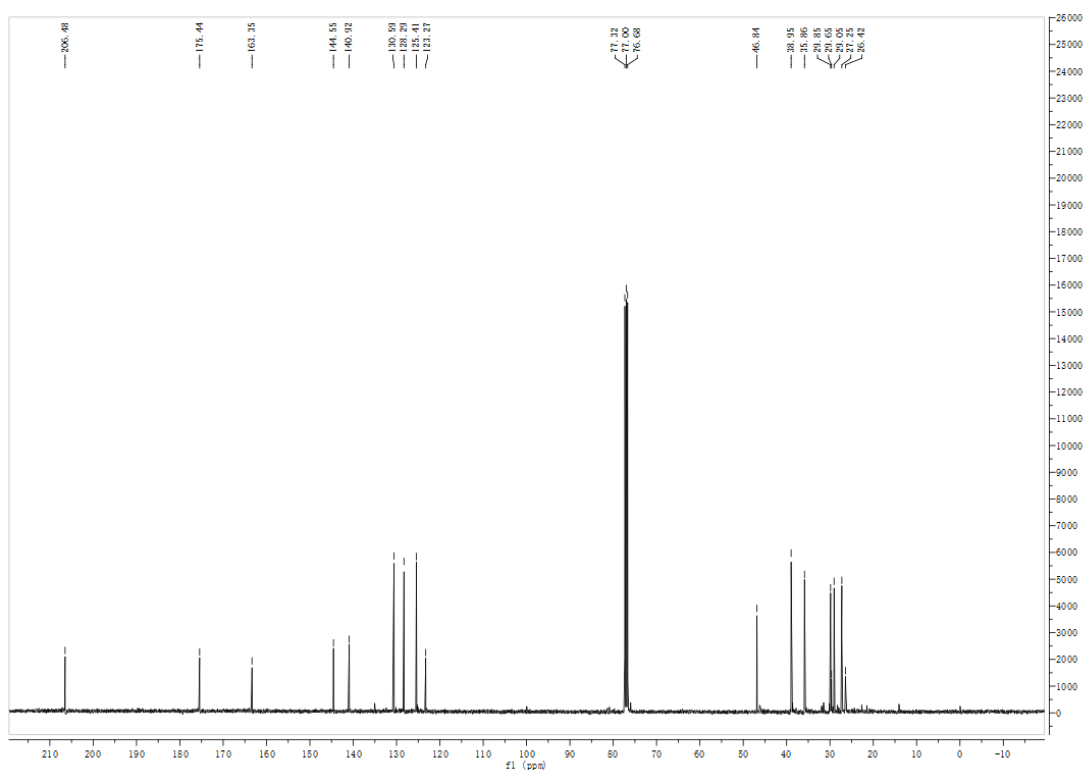

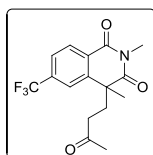

3g

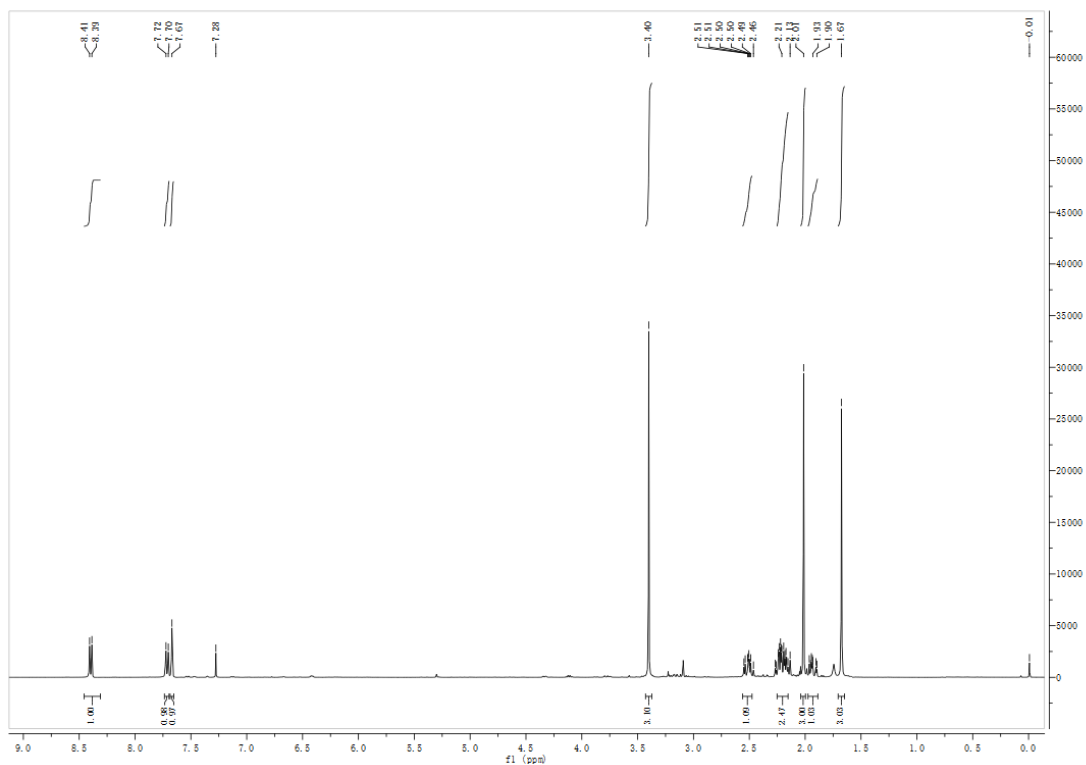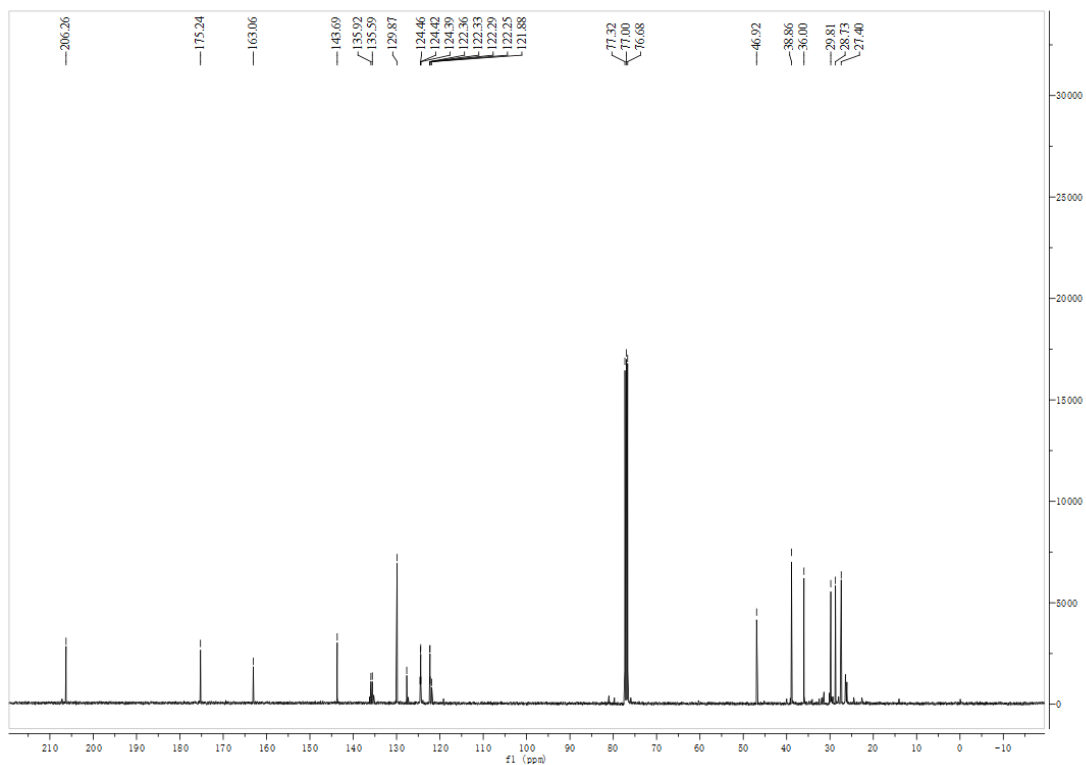

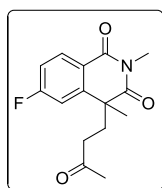

3h

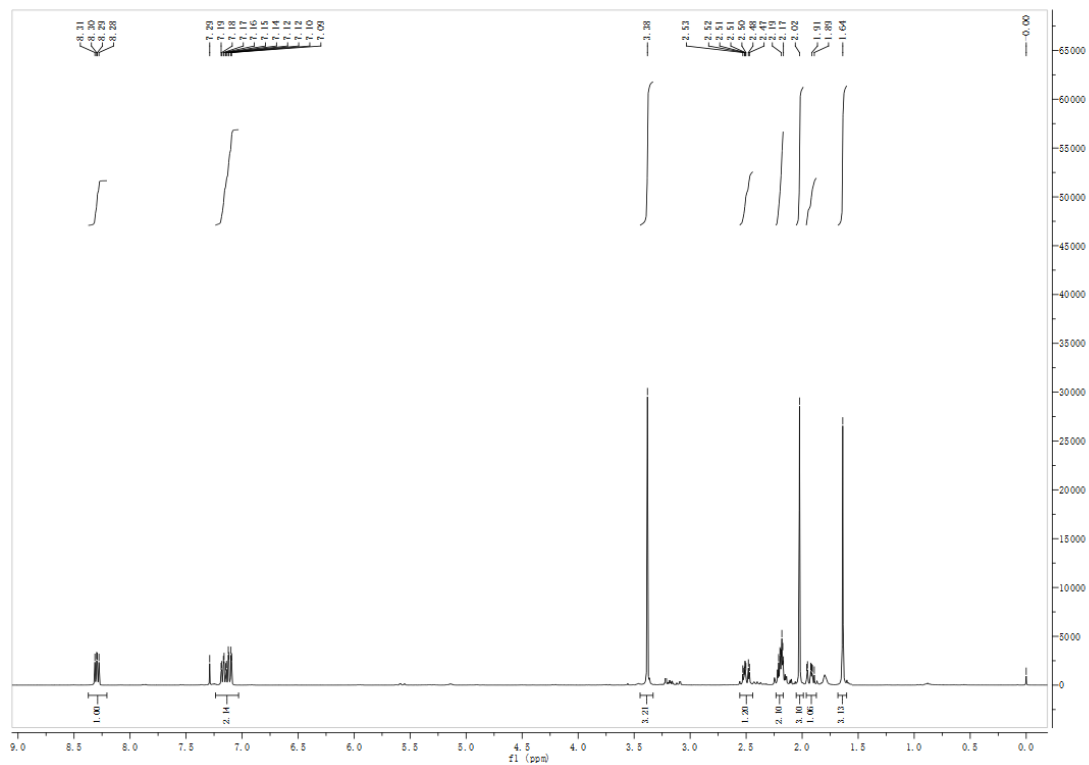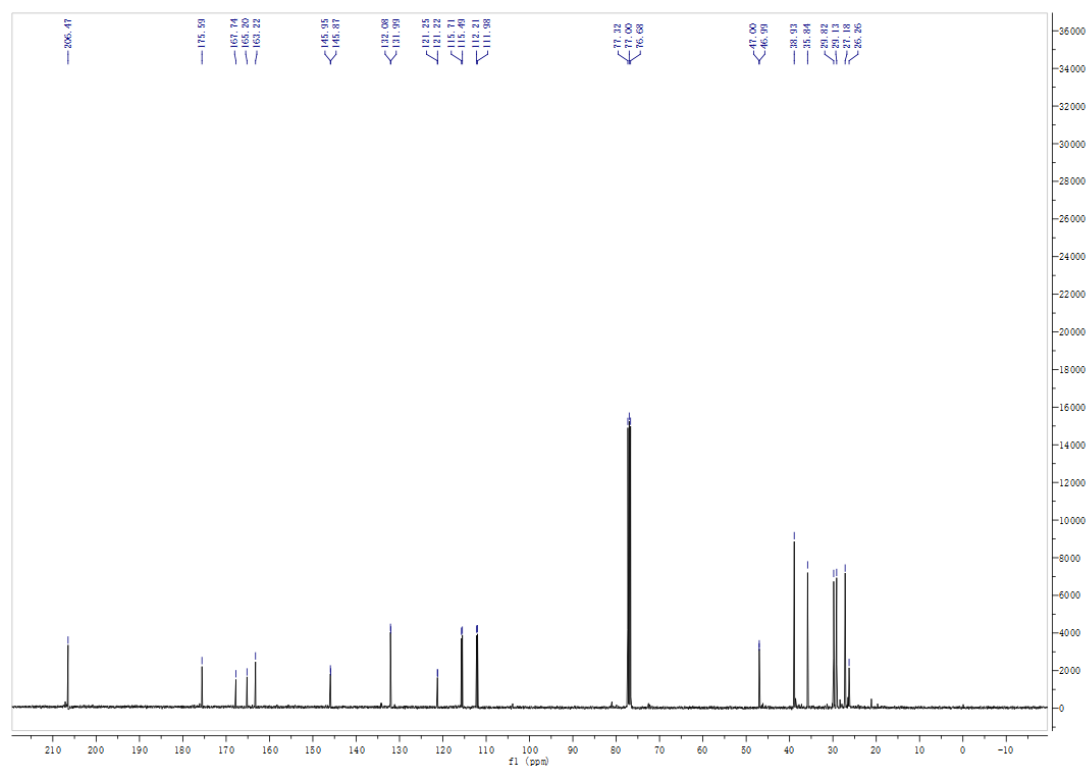

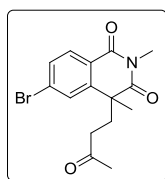

3i

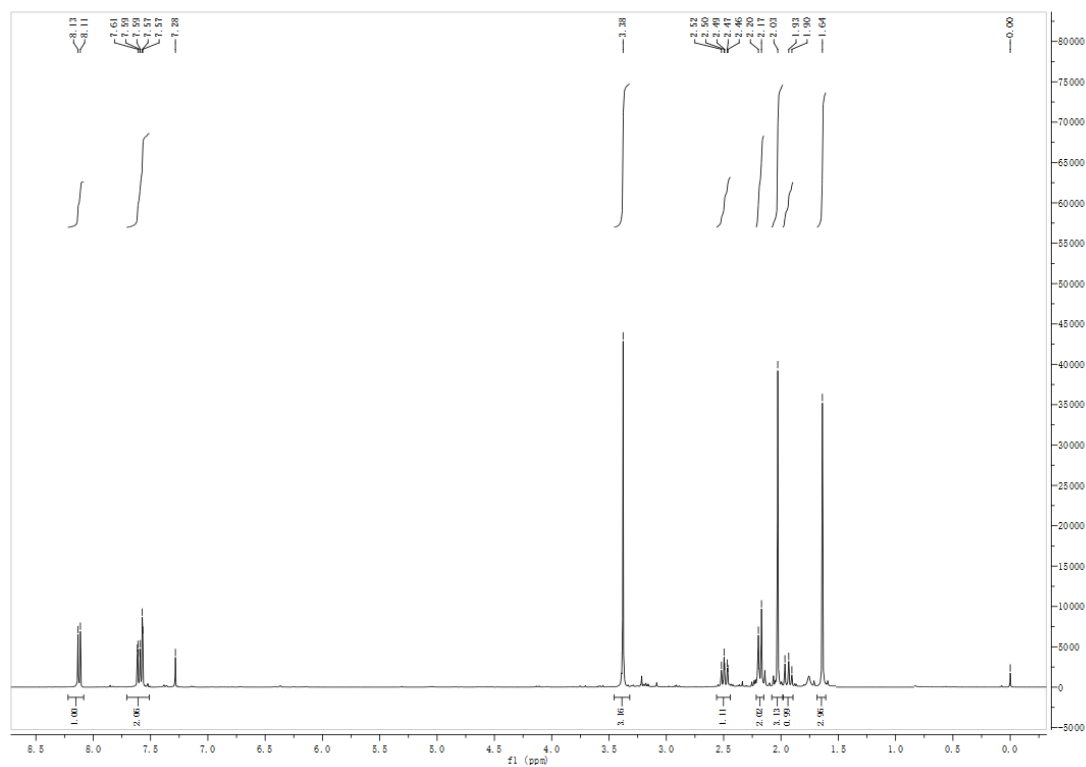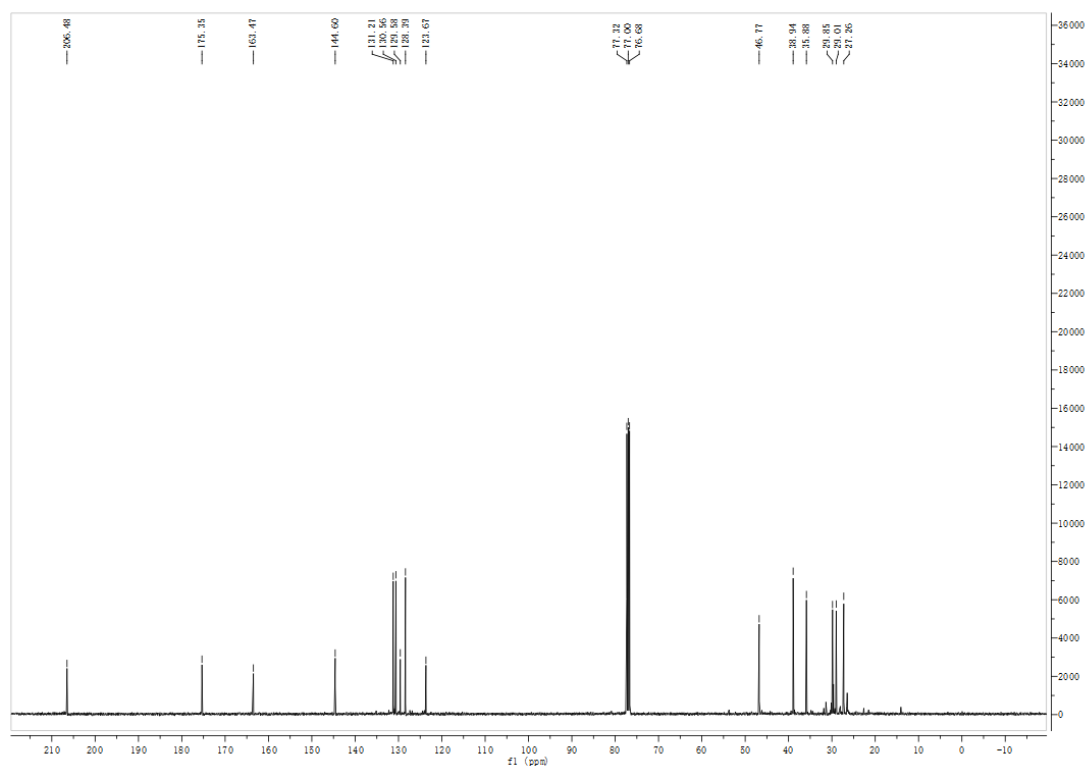

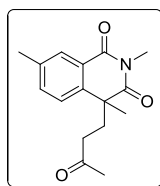

3j

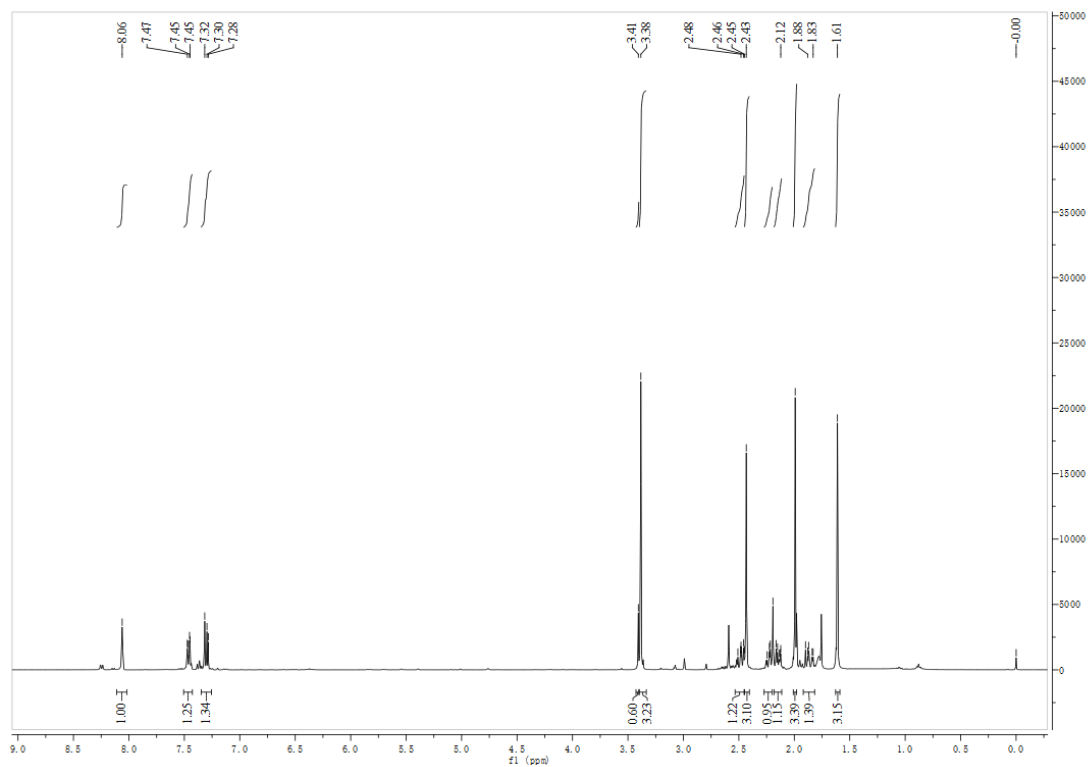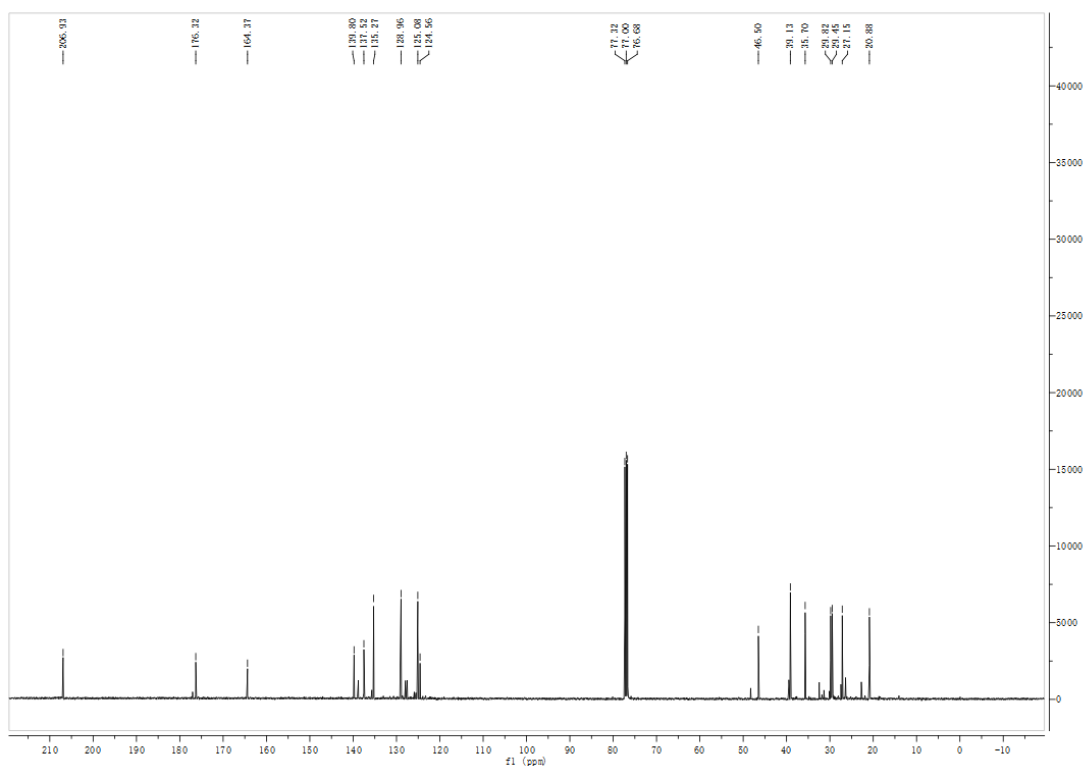

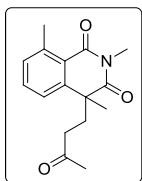

3k

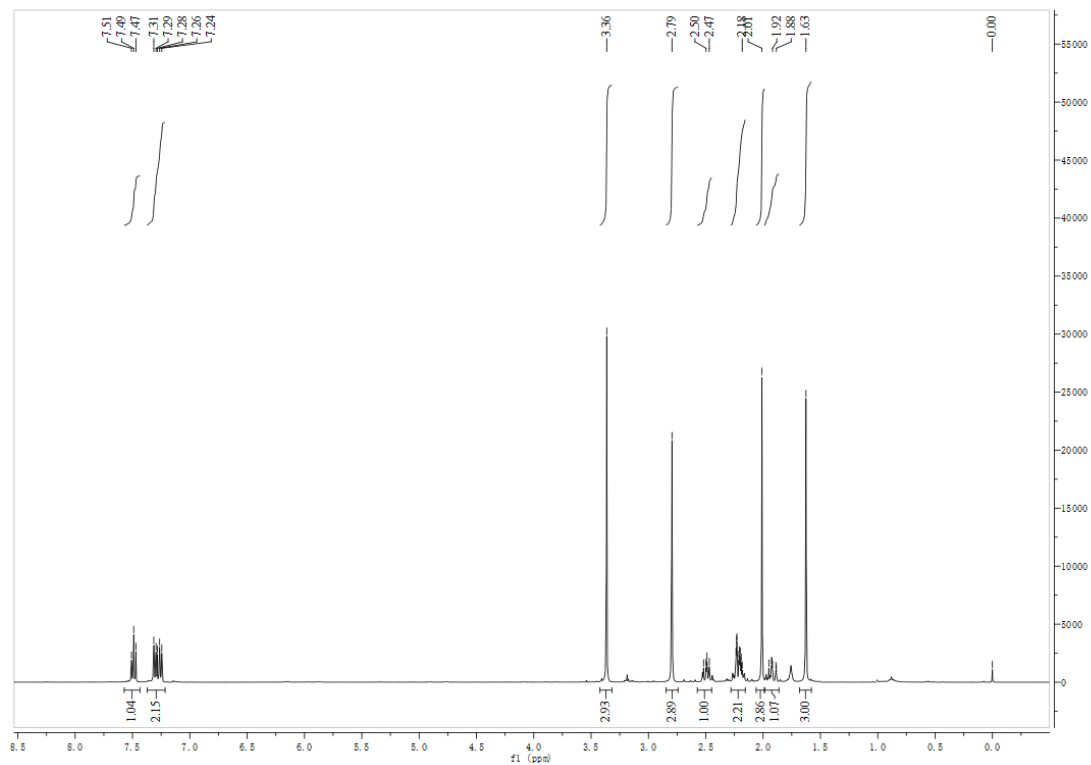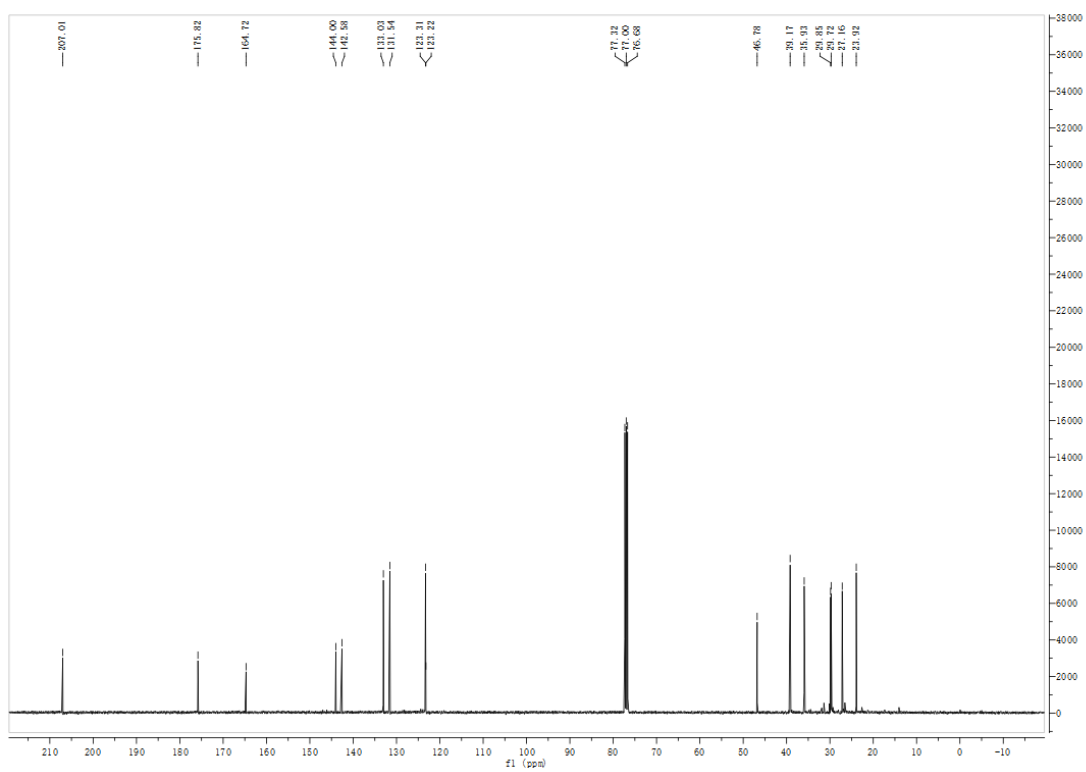

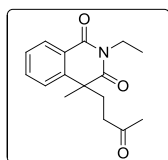

31

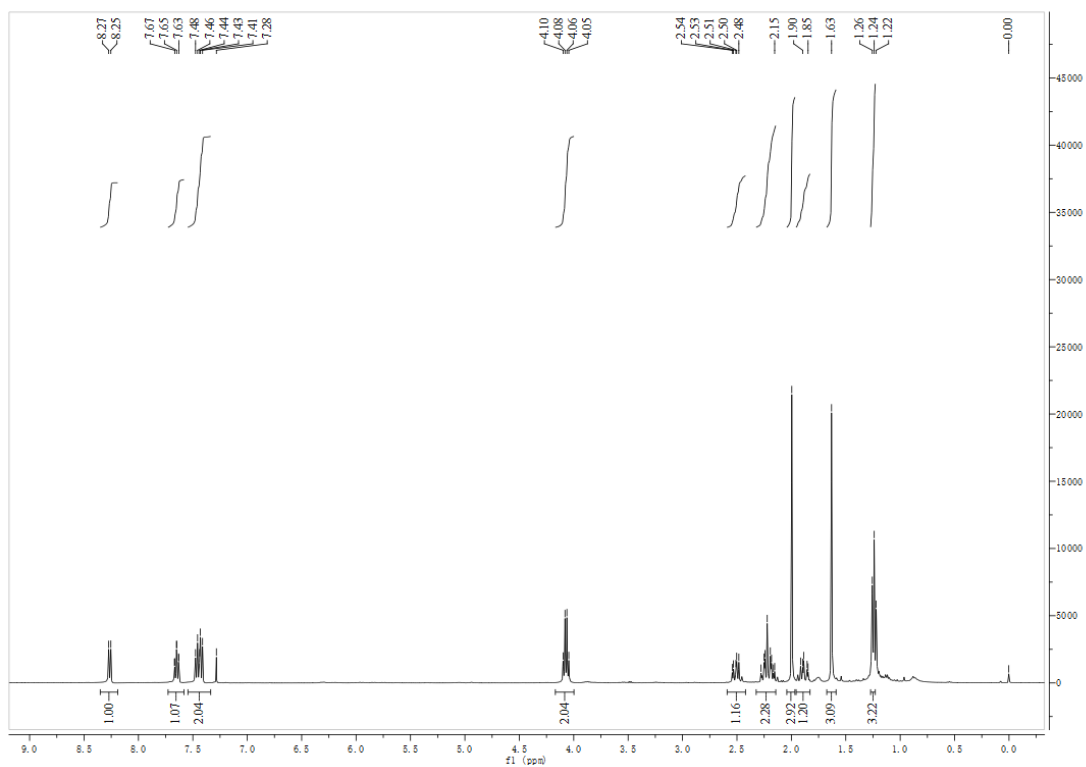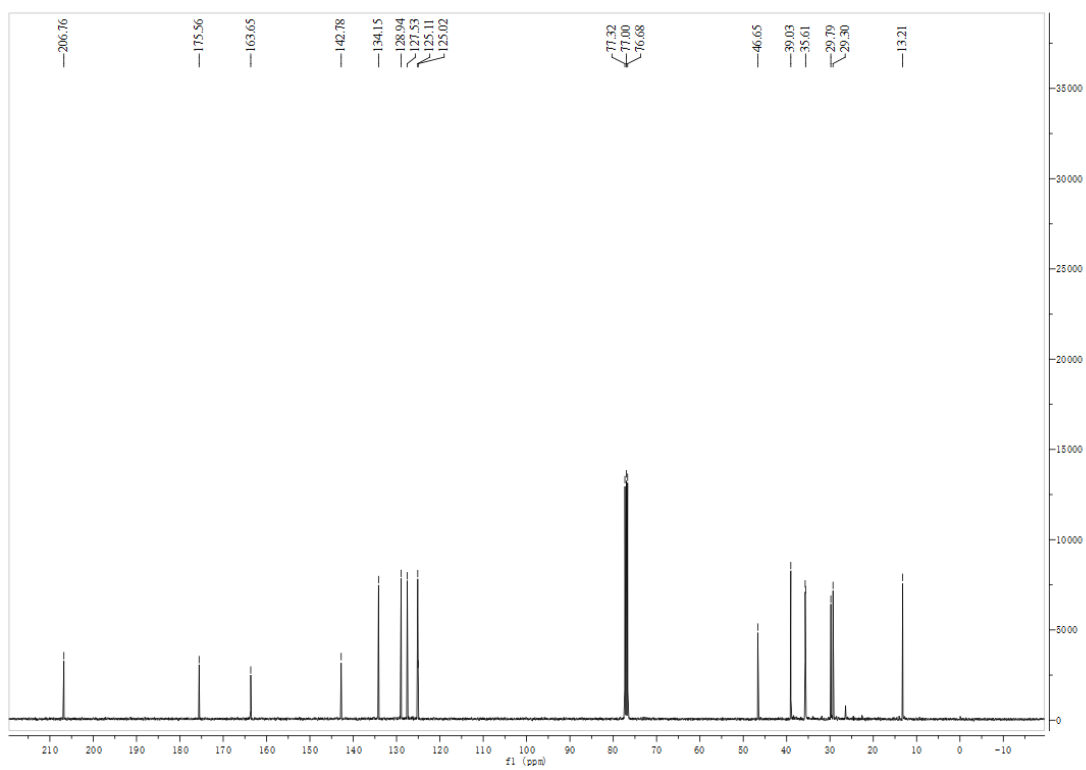

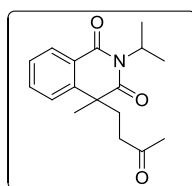

3m

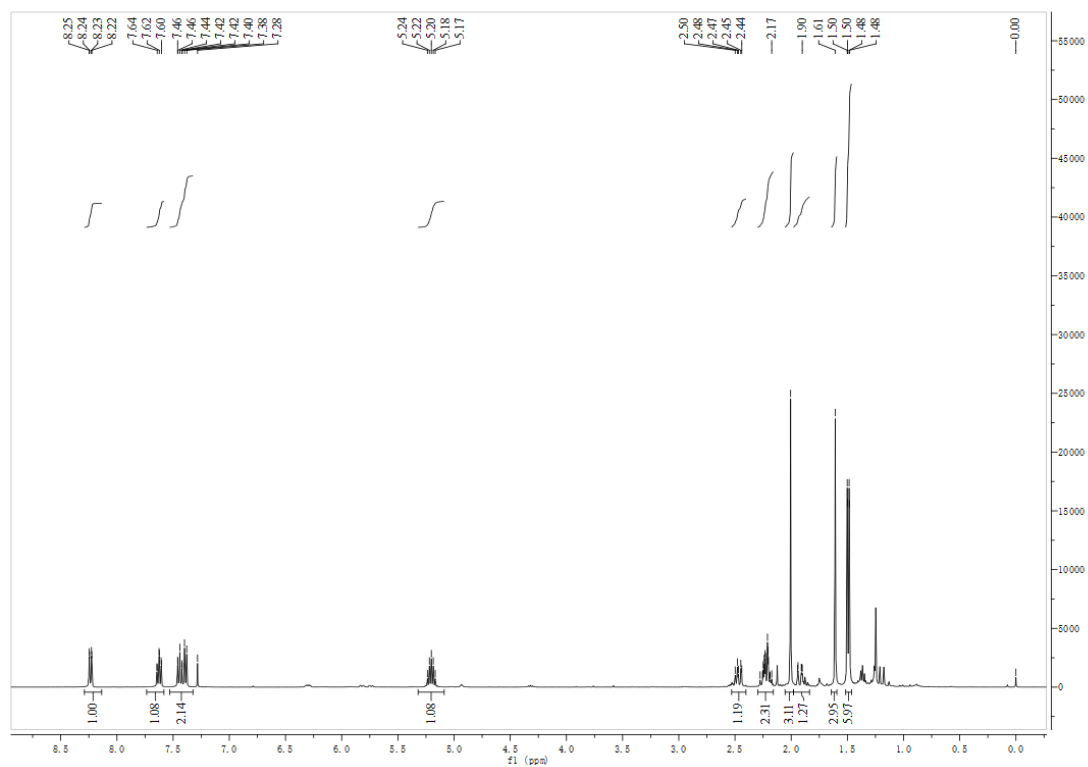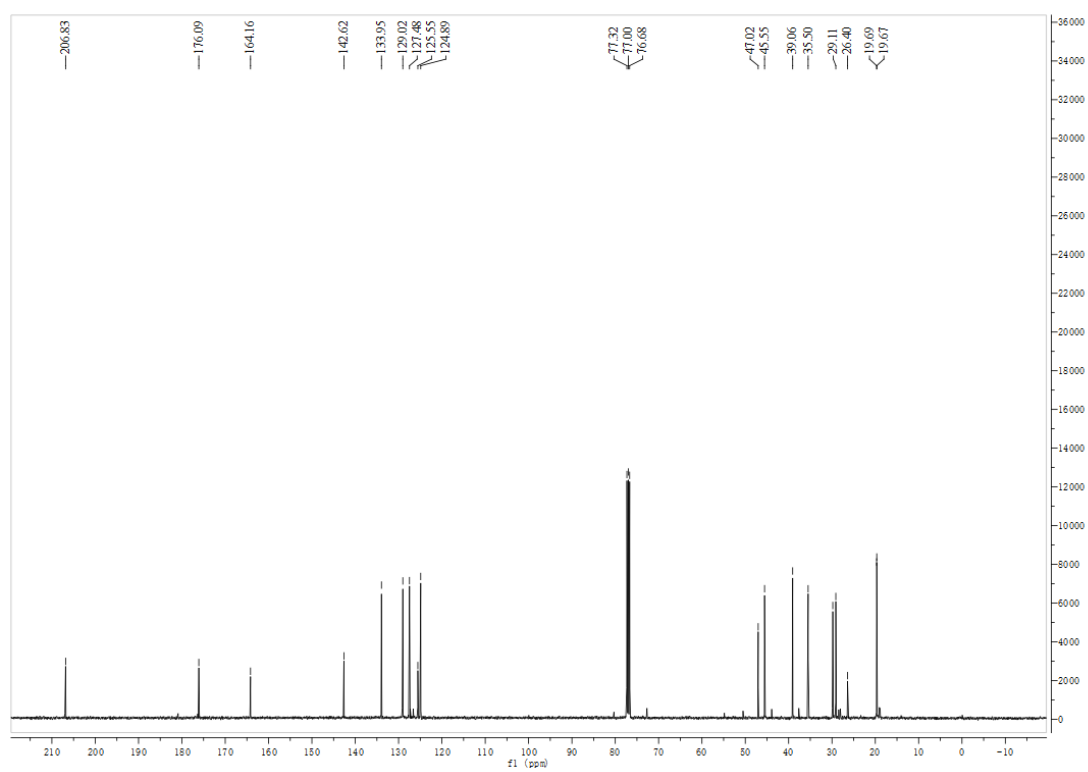

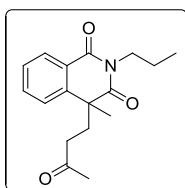

3n

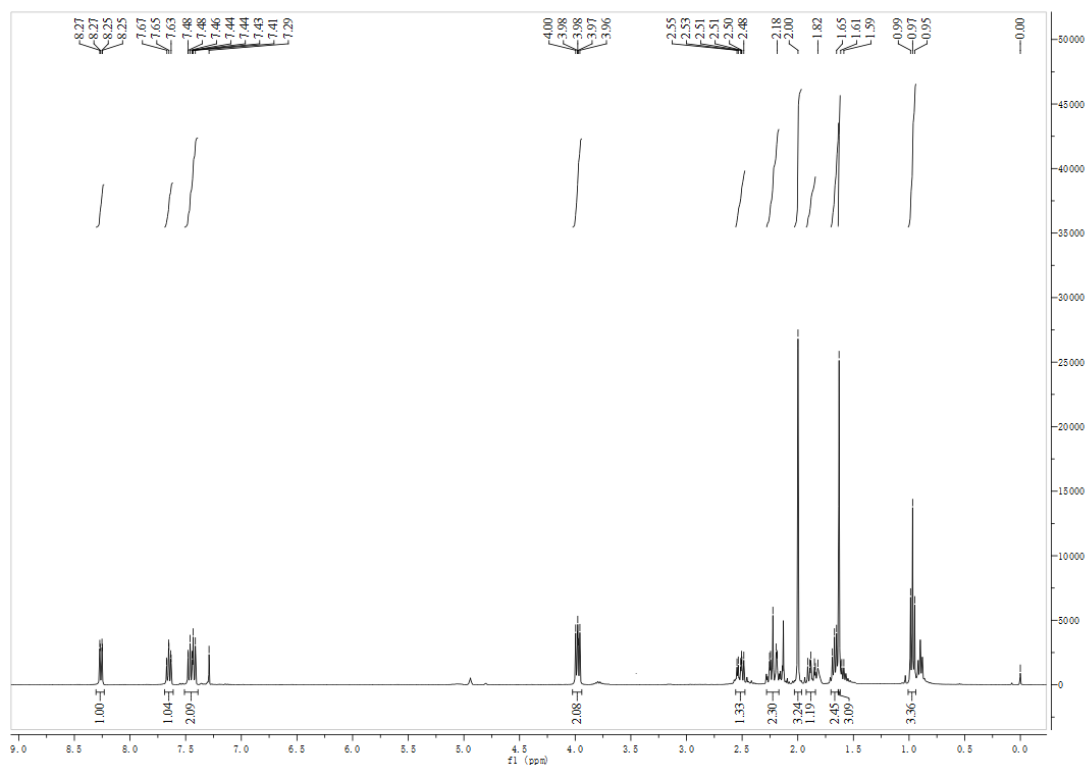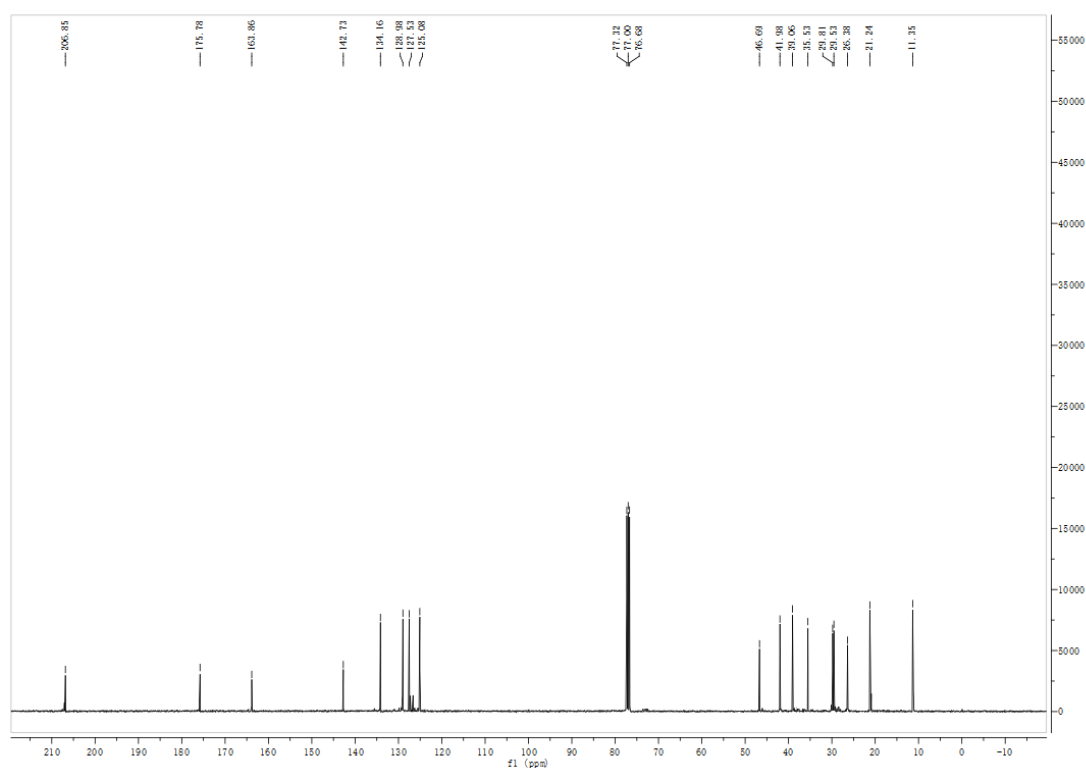

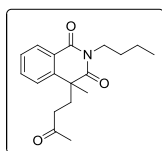

30

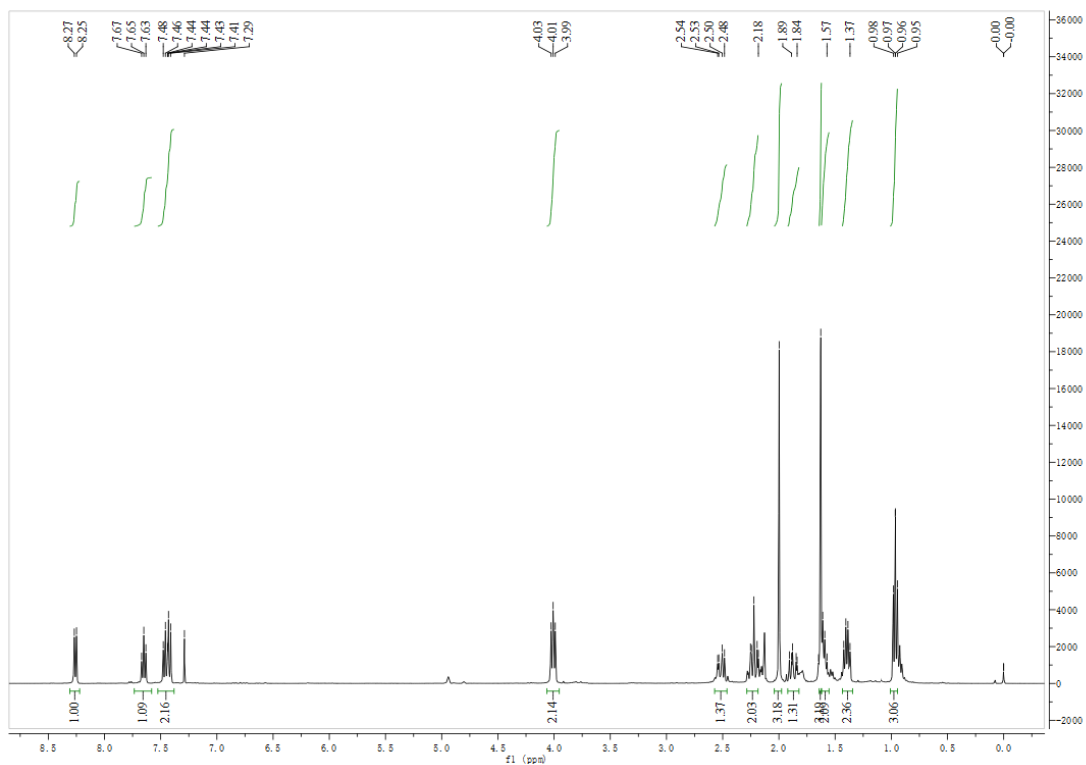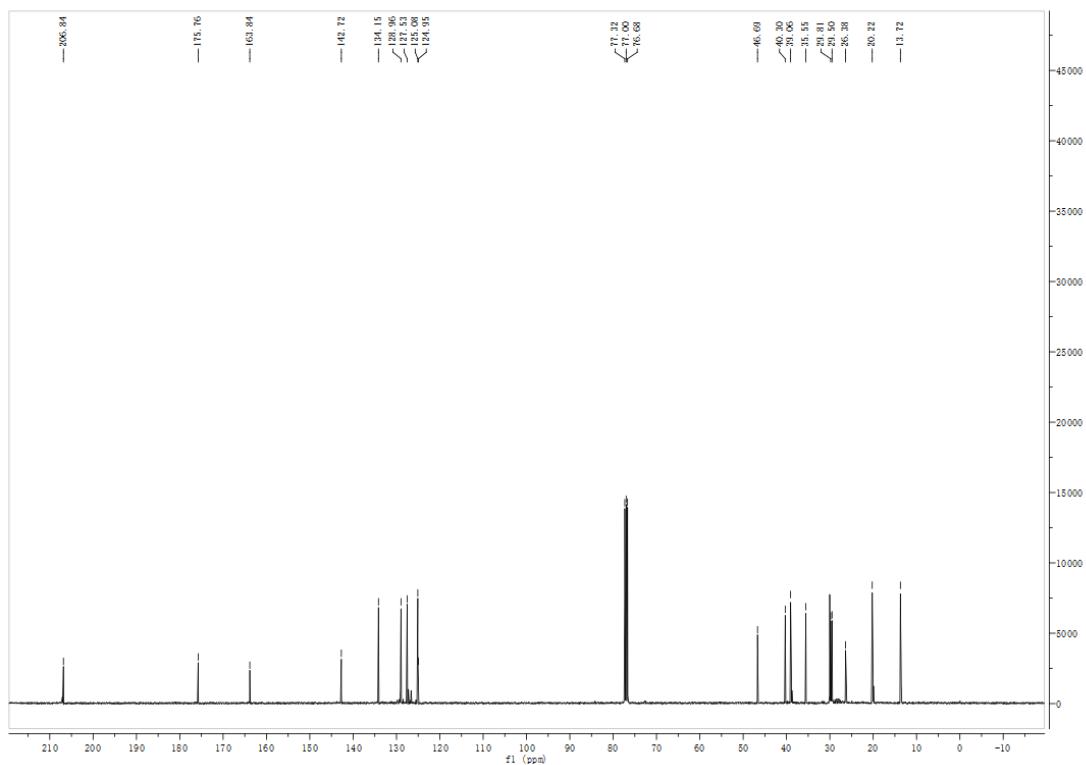

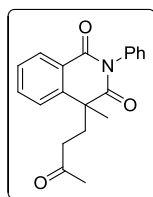

3p

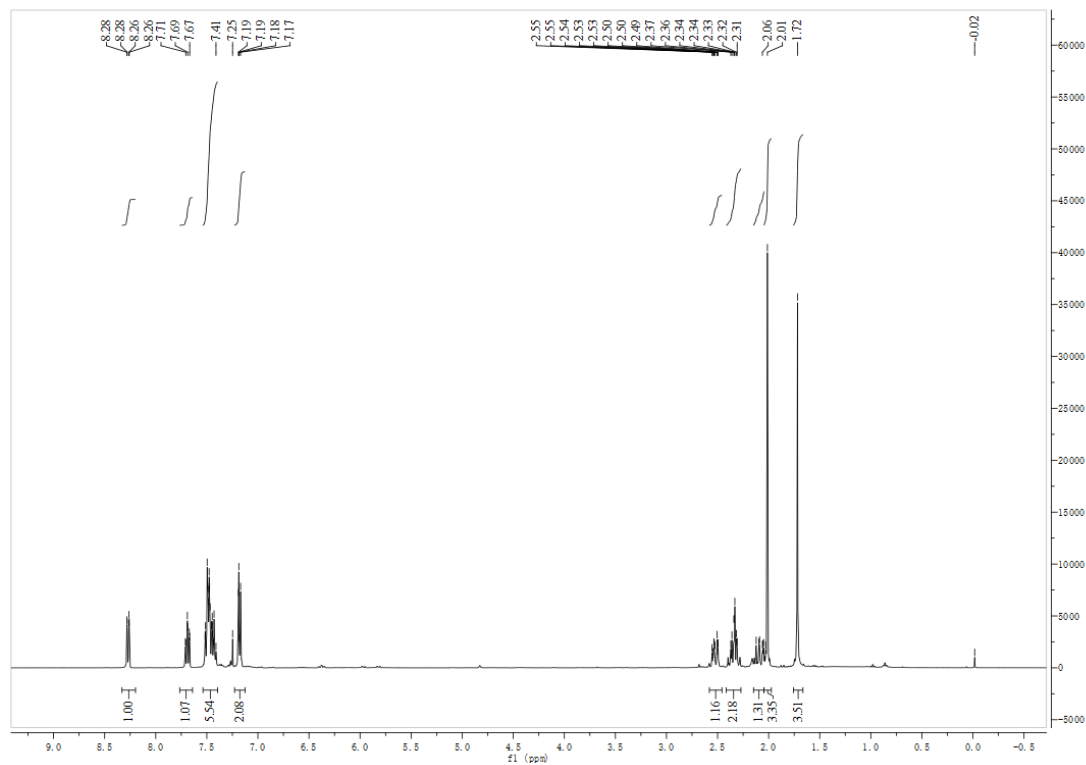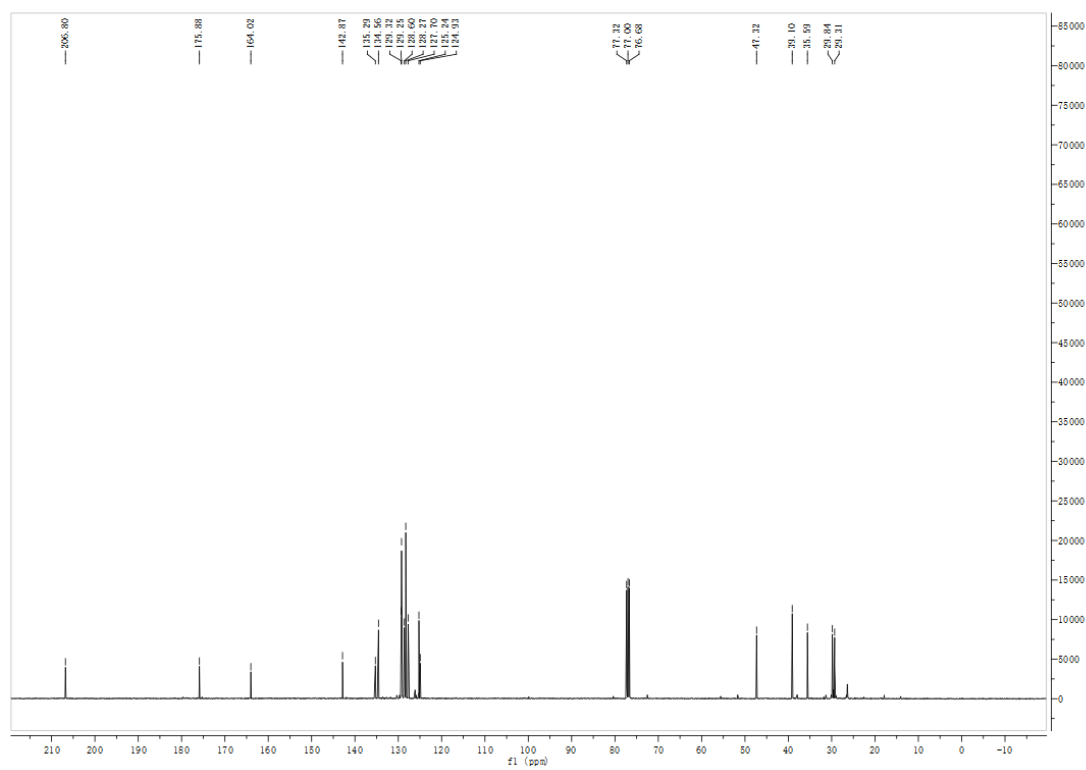

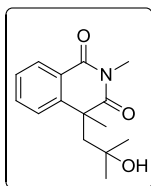

4a

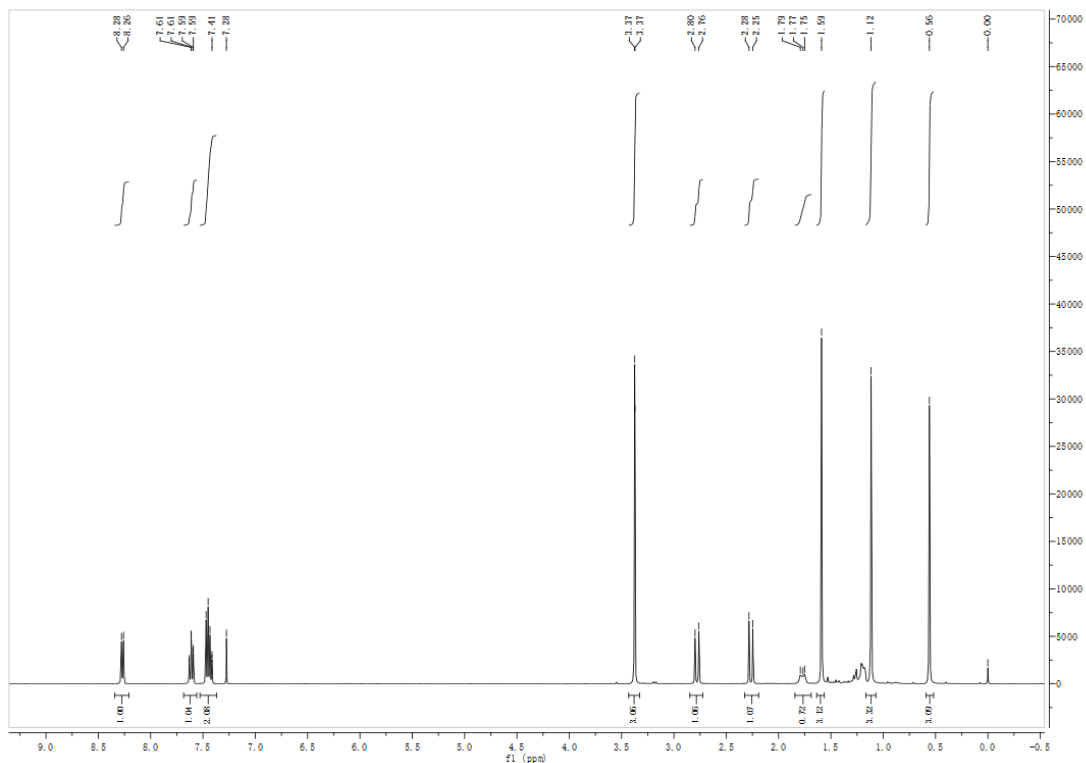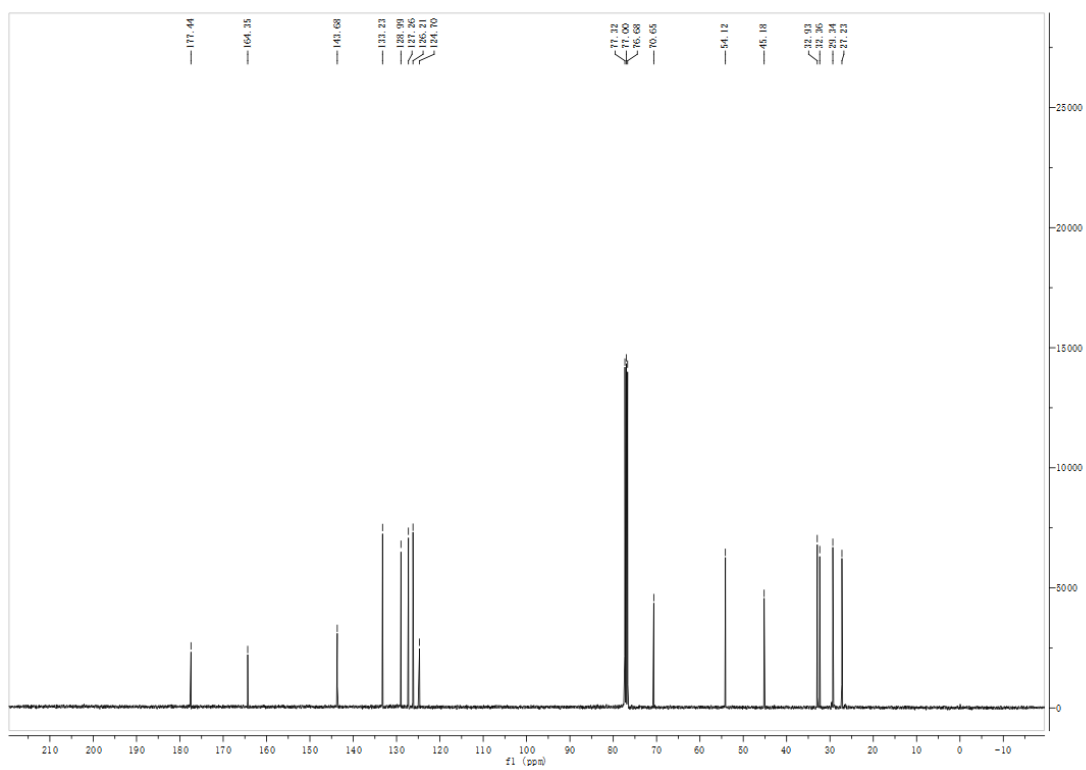

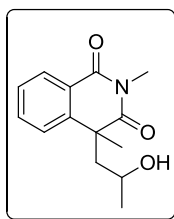

4b

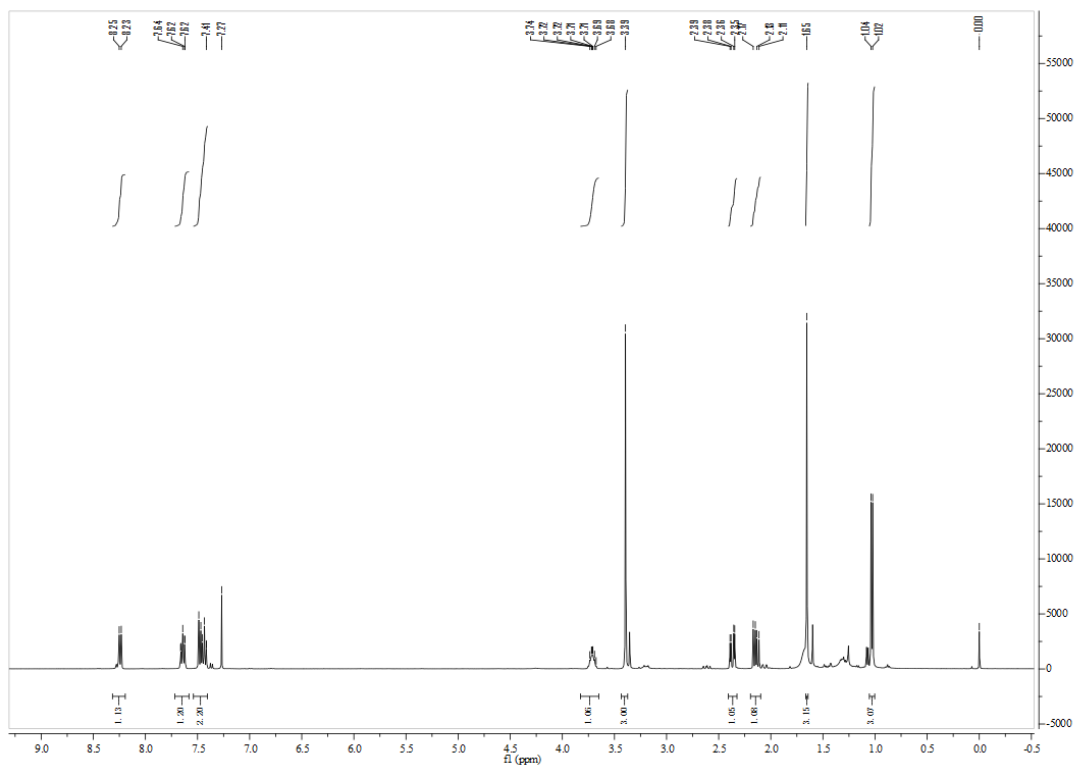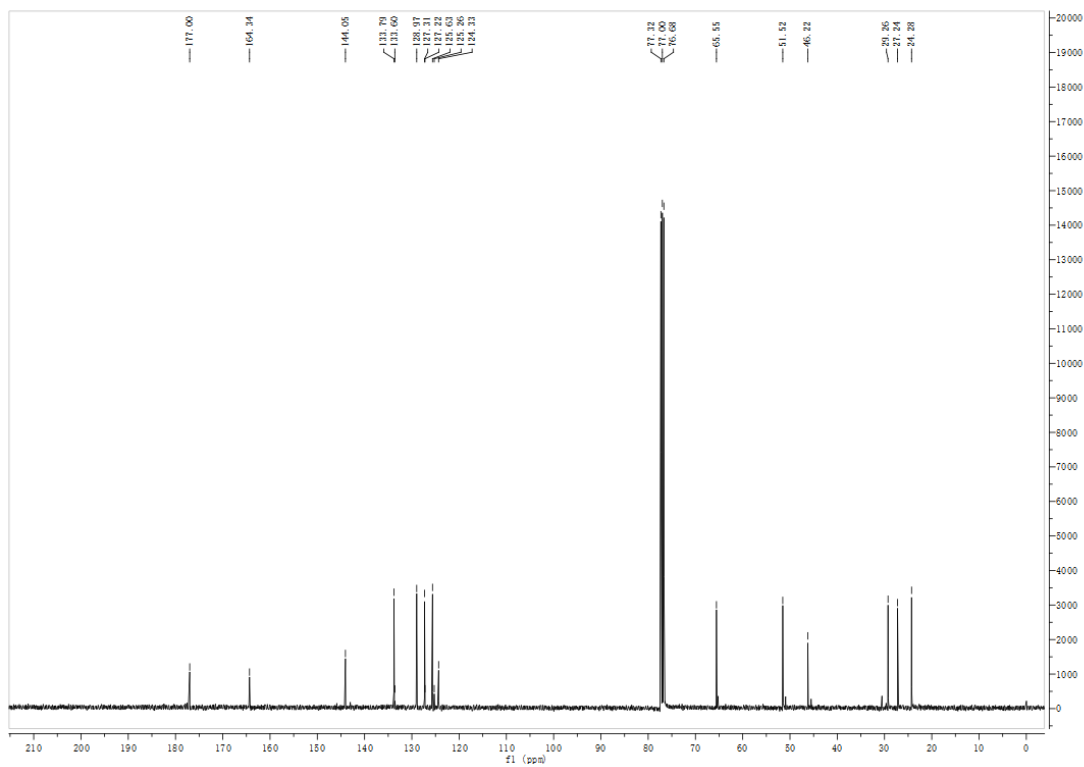

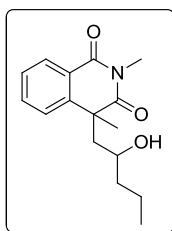

4c

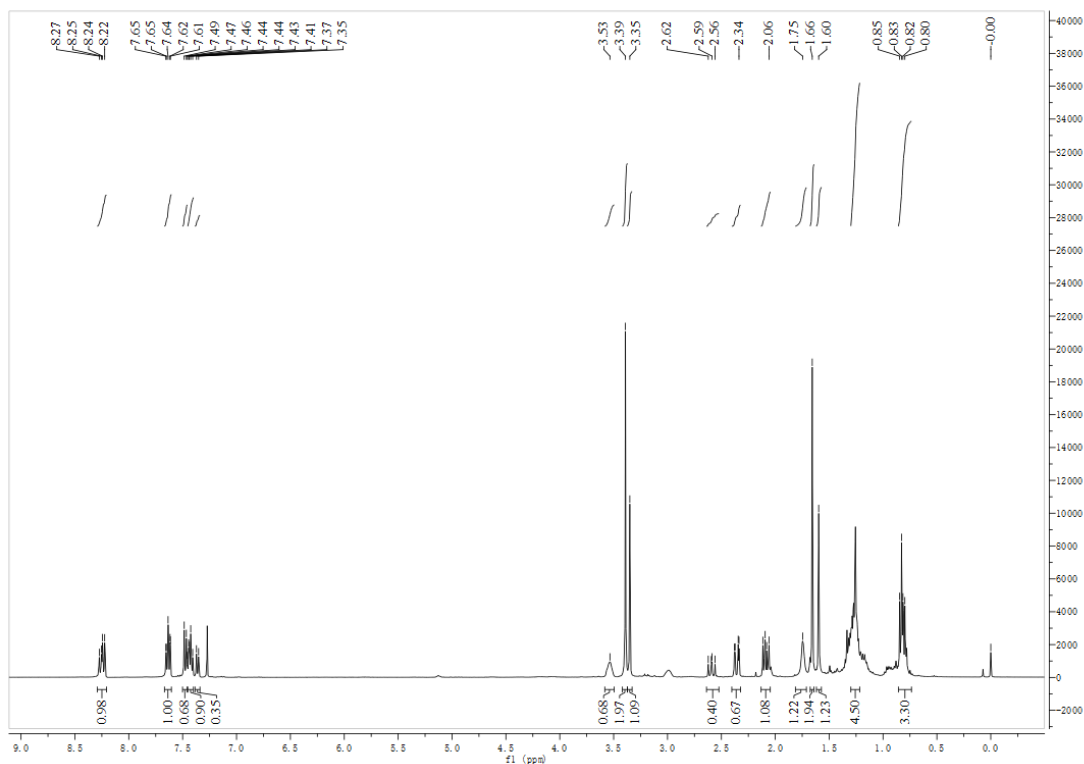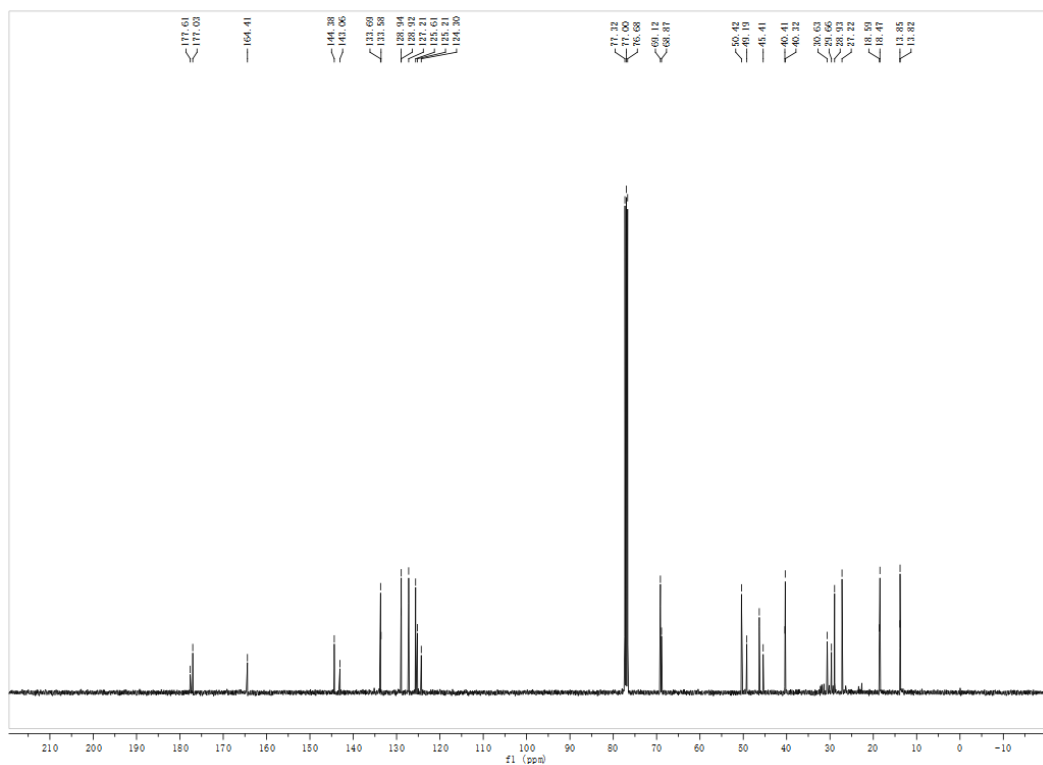

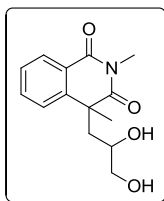

4d

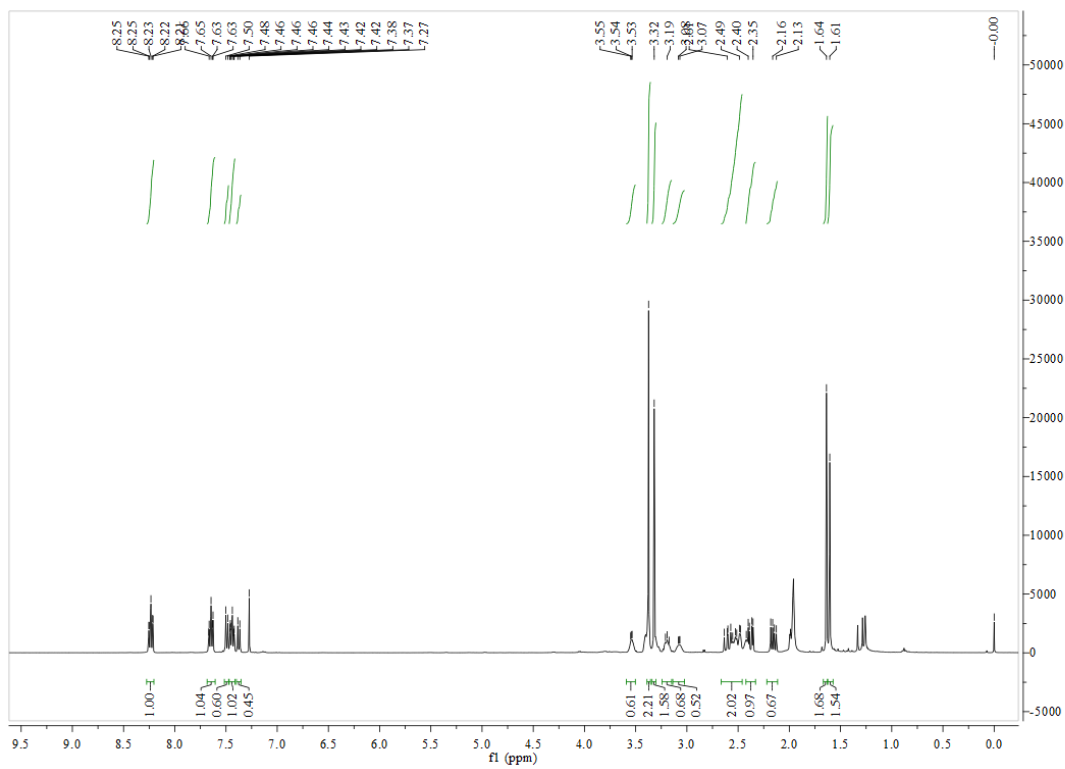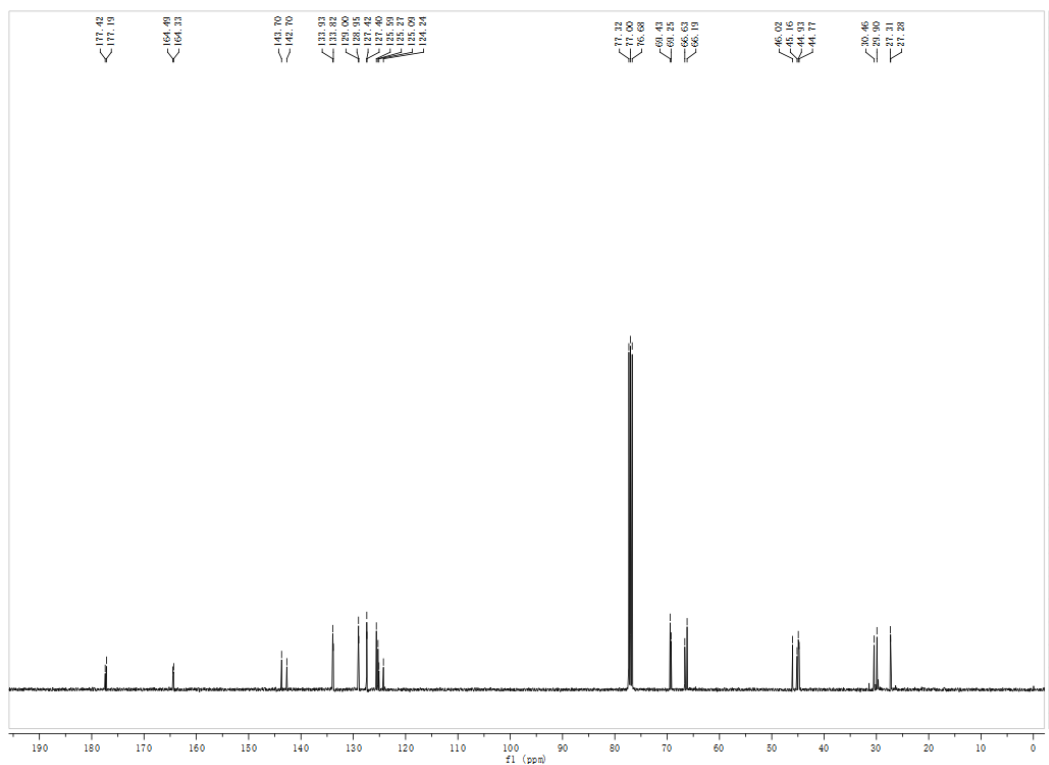

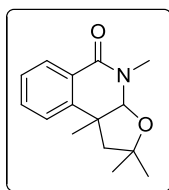

6a

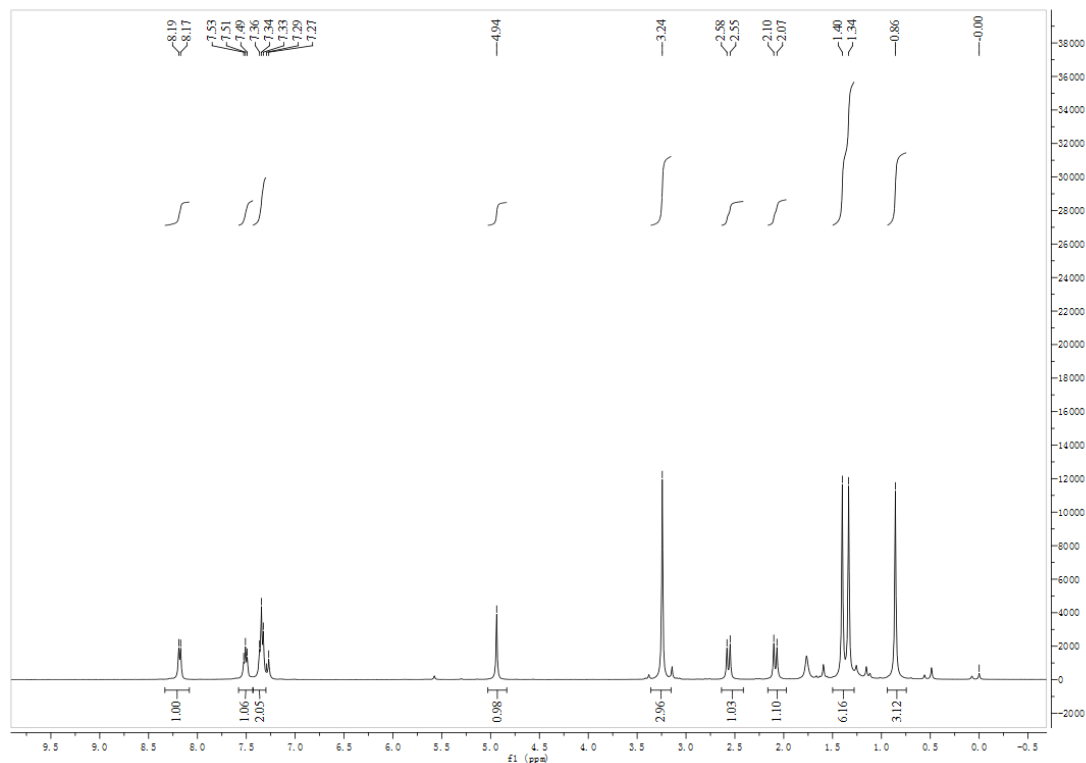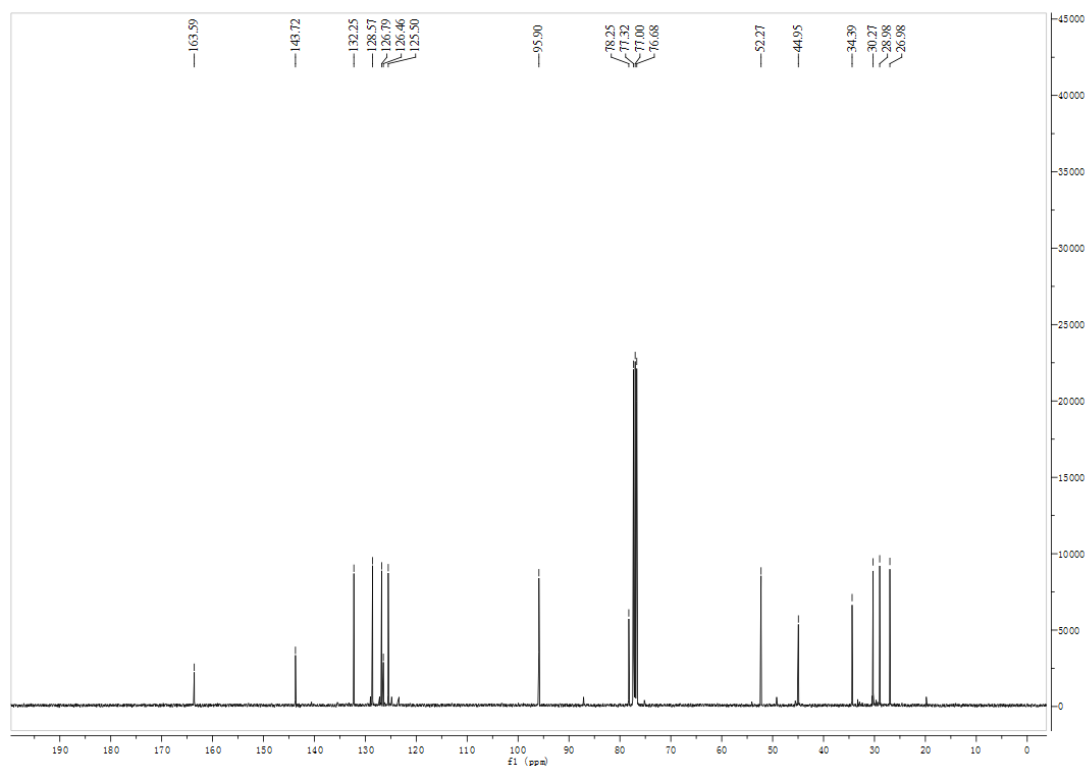

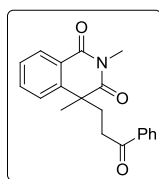

3q

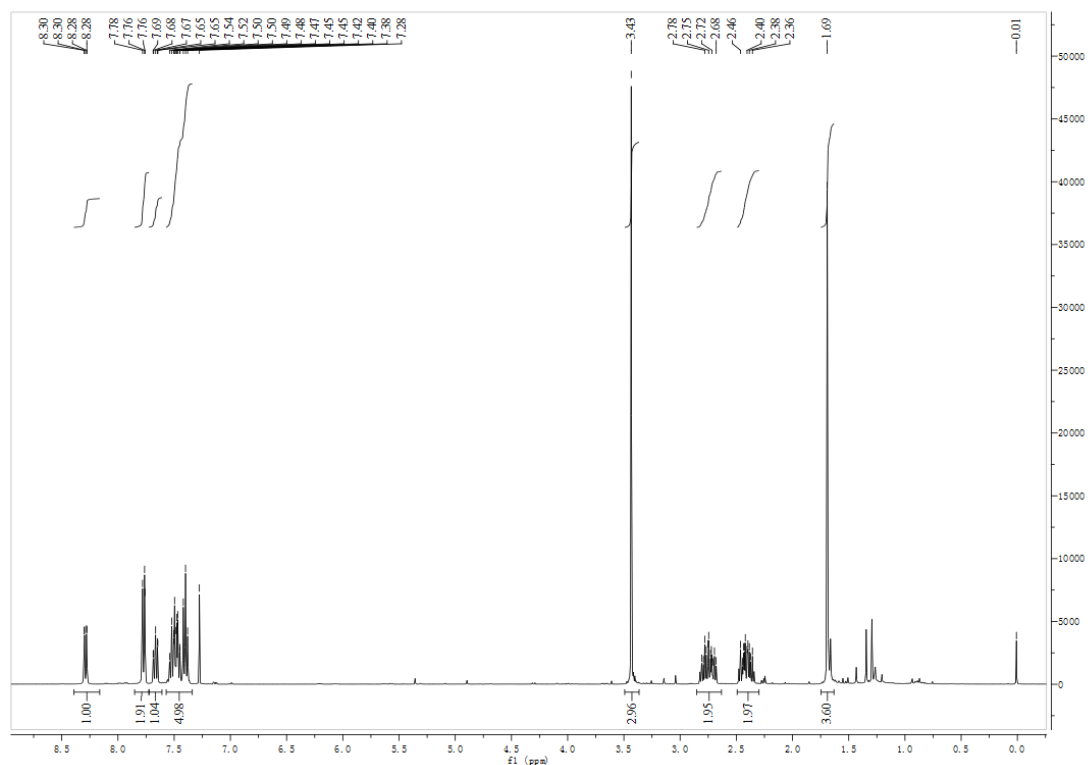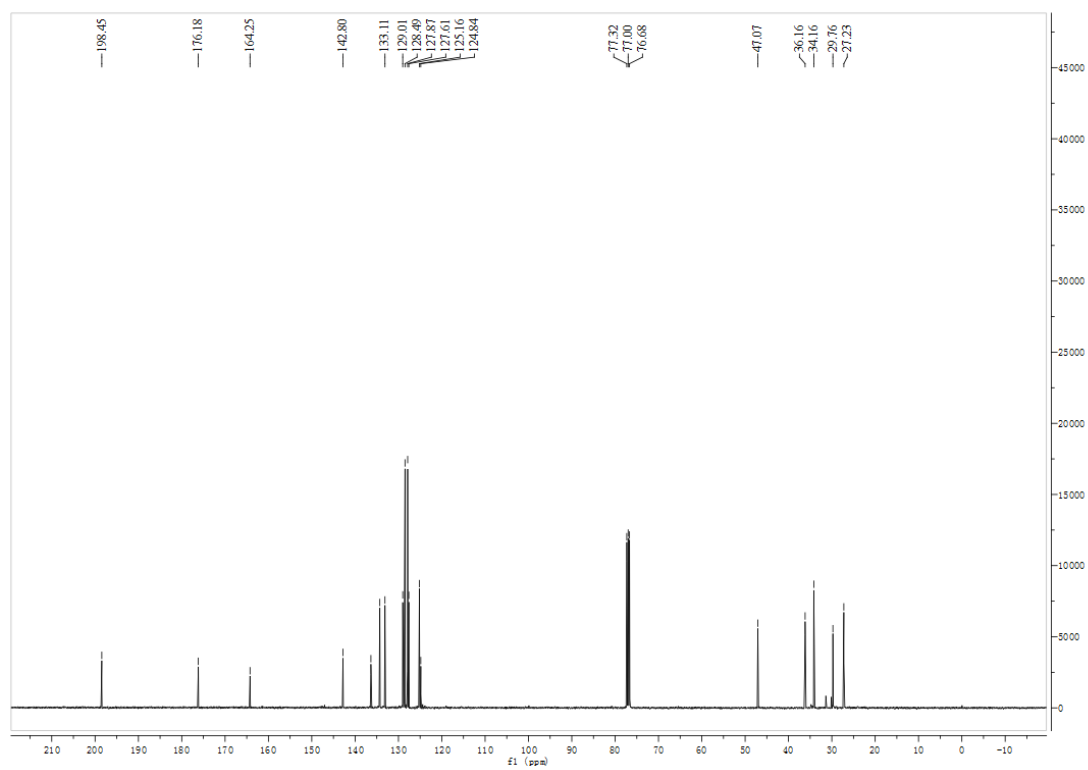

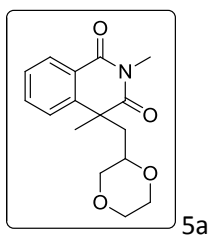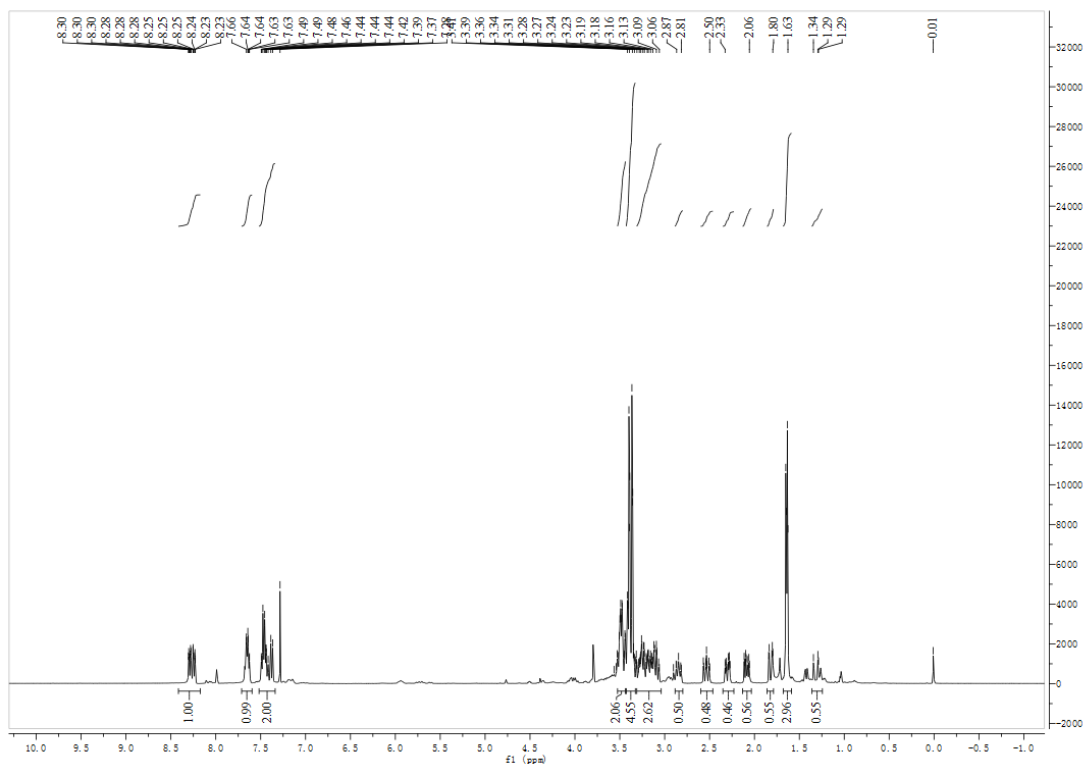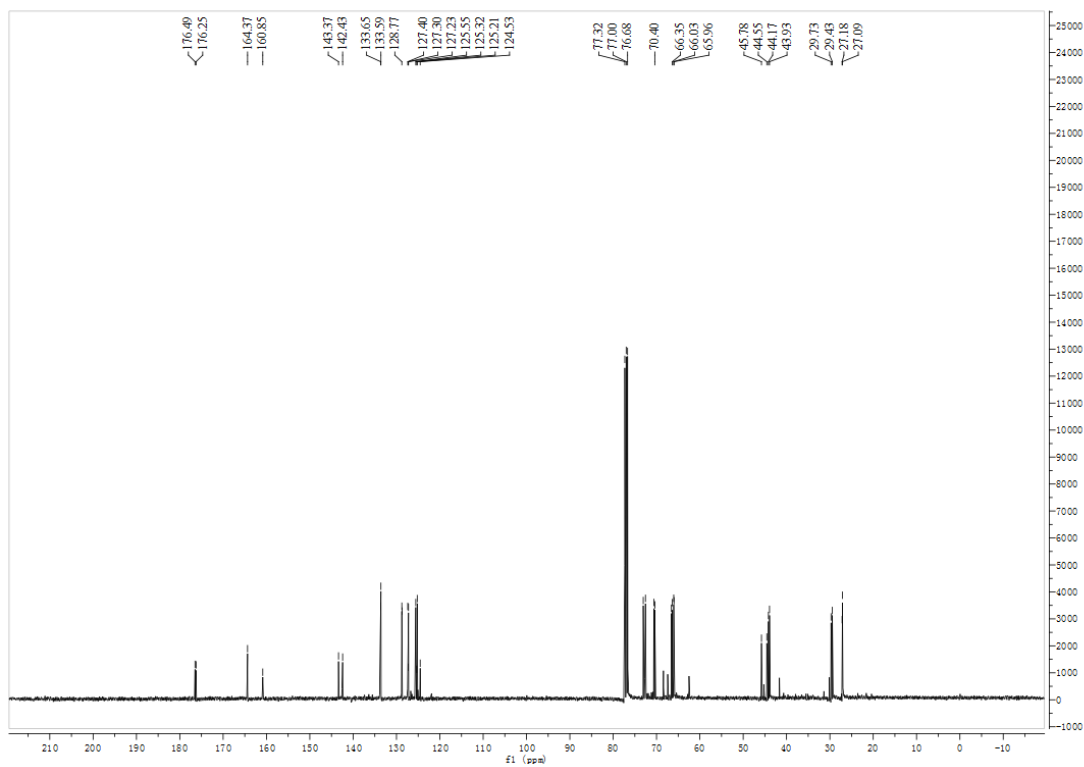

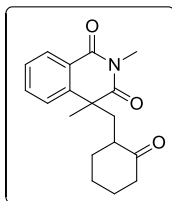

3r, isomer-1, low polarity

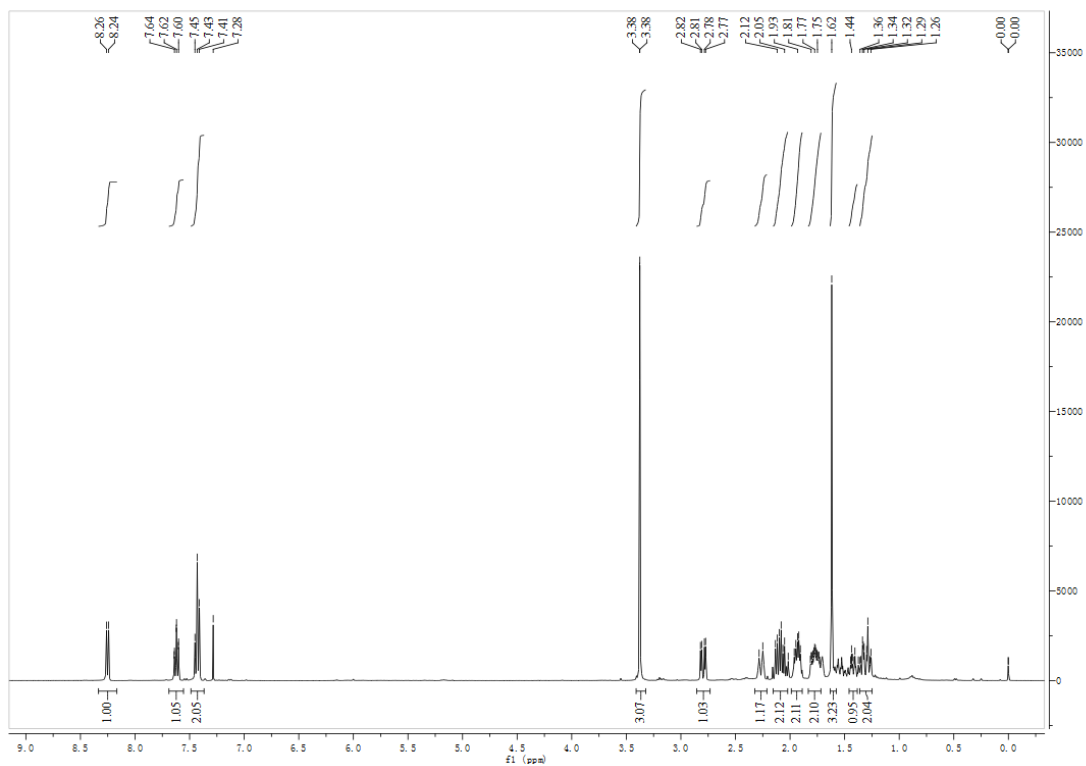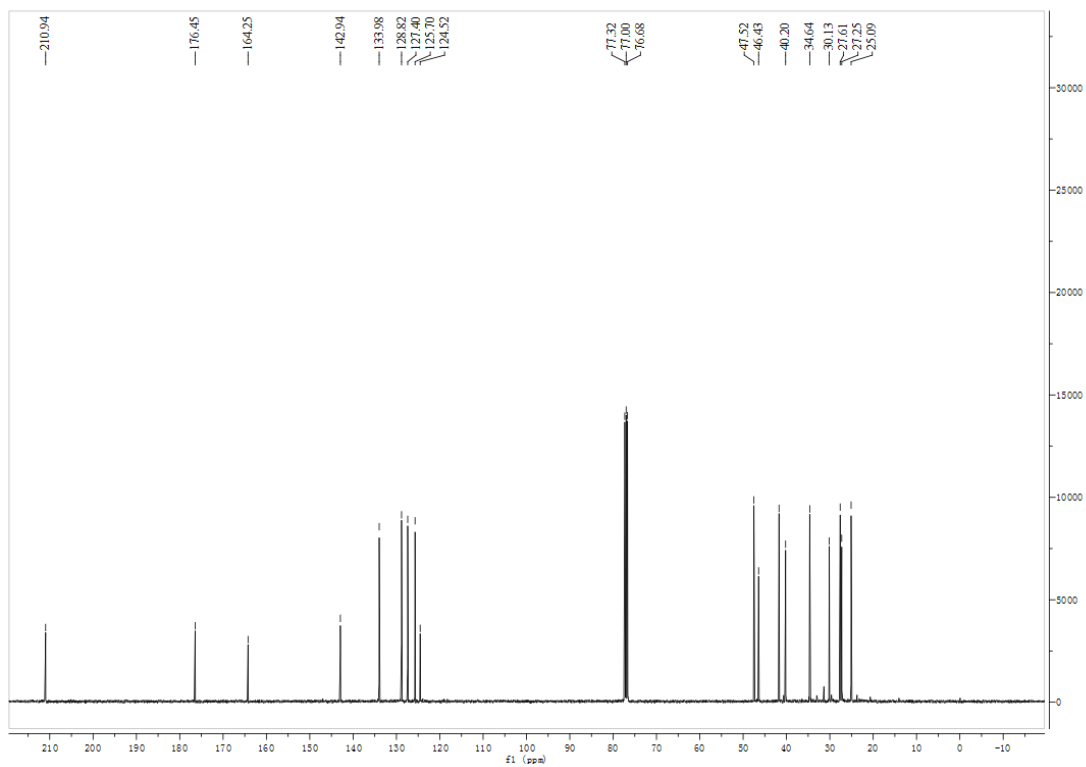

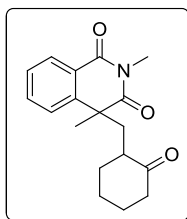

3r, isomer-2, high polarity

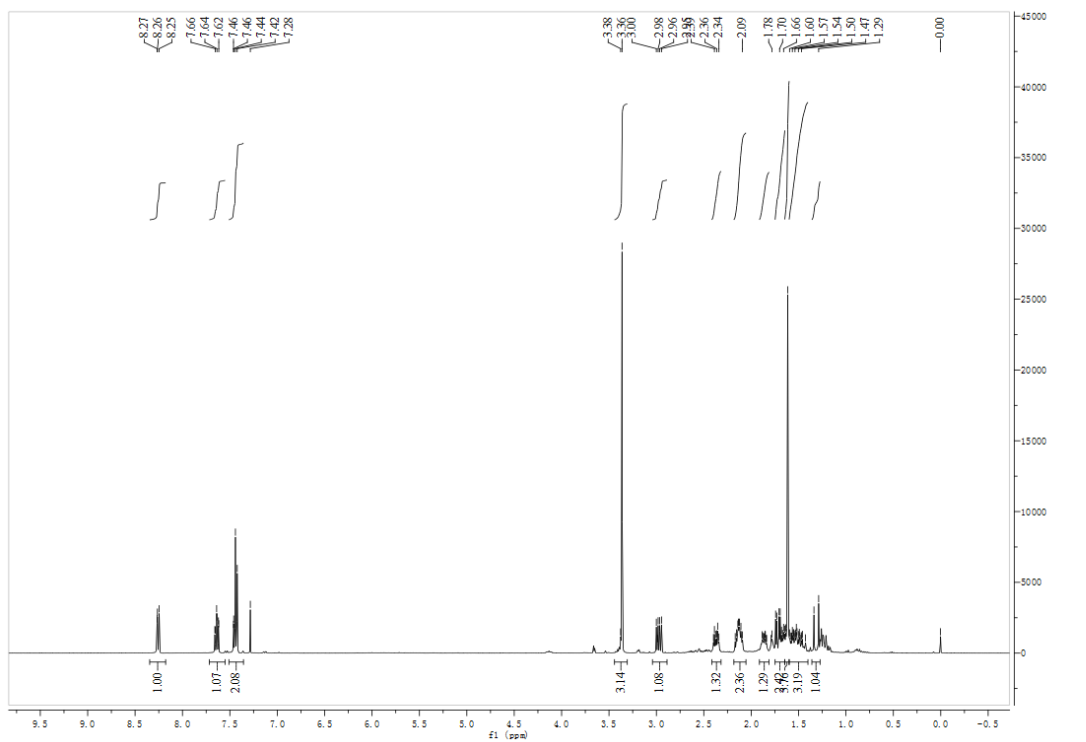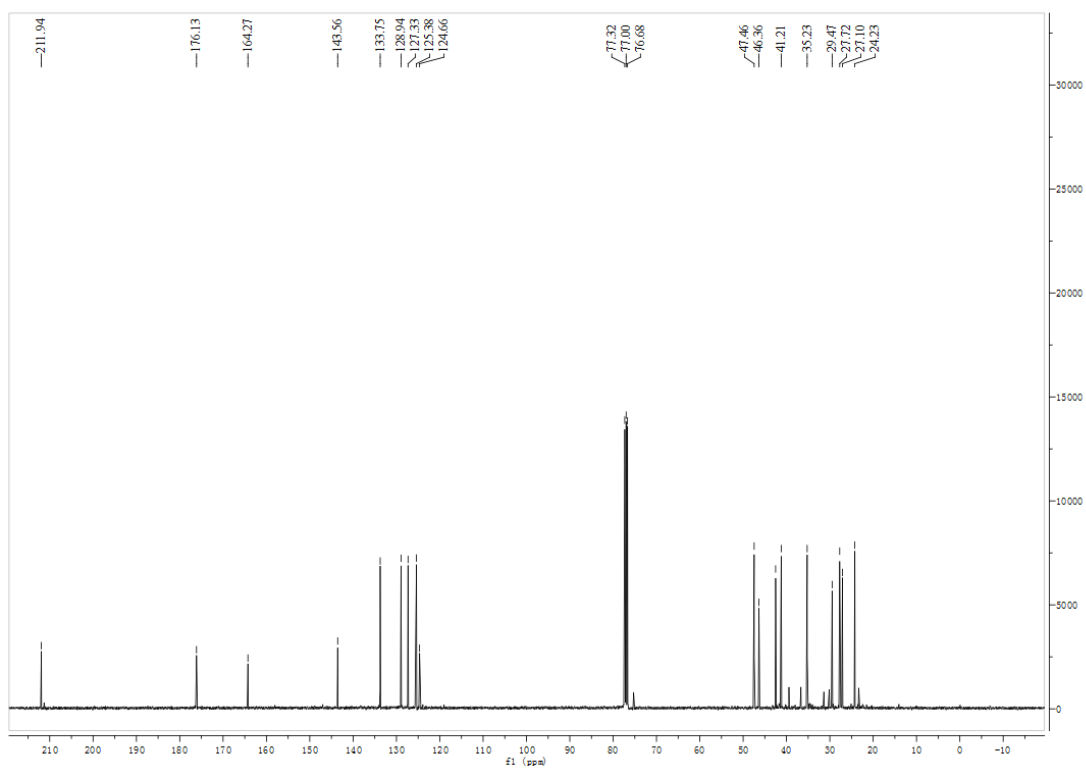

Supplement: c6ra12657j1.pdf [file c6ra12657j1.pdf]
